# Supplementary material for: Comparative Analysis of Akebia trifoliata Fruit Softening at Different Flesh Ripening Stages Using Tandem Mass Tag Technology
Source: Front Nutr. 2021 Jul 5;8:684271. doi: 10.3389/fnut.2021.684271 (PMC8287030; doi:10.3389/fnut.2021.684271)
Supplement: Supplementary Table 2 — Summary of differentially accumulated proteins. [file Table_2.xlsx]

## Sheet: Sheet1
Table S2 Differentially accumulated proteins.
Protein IDs	NR description	HR_UR	t test p value	FR_HR	t test p value	GO_annotation	KEGG Pathway_annotation
TRINITY_DN136943_c1_g8	stearoyl-[acyl-carrier-protein] 9-desaturase, chloroplastic [Herrania umbratica]	1.99352	0.00239524	0.586799	0.0122431	-	ko04141(Protein processing in endoplasmic reticulum)
TRINITY_DN140574_c0_g4	17.8 kDa class I heat shock protein-like [Prunus avium]	1.23255	0.027652	0.751048	0.028117	GO:0006633(BP:fatty acid biosynthetic process);GO:0055114(BP:oxidation-reduction process);GO:0009507(CC:chloroplast);GO:0045300(MF:acyl-[acyl-carrier-protein] desaturase activity)	-
TRINITY_DN141347_c0_g4	Fatty acid desaturase [Macleaya cordata]	1.60442	5.8e-05	0.769702	0.0403867	GO:0016787(MF:hydrolase activity)	-
TRINITY_DN184790_c0_g1	PREDICTED: beta-fructofuranosidase, insoluble isoenzyme 1-like, partial [Juglans regia]	1.57567	0.0331594	0.596584	0.0375779	-	ko04141(Protein processing in endoplasmic reticulum)
TRINITY_DN136247_c3_g9	small heat shock protein 17.3 kDa [Vitis vinifera];gi|269838636|gb|ACZ48683.1| small heat shock protein 17.3 kDa [Vitis vinifera]	1.43377	0.0102536	0.67383	0.0263196	GO:0016491(MF:oxidoreductase activity)	ko00333(Prodigiosin biosynthesis);ko01040(Biosynthesis of unsaturated fatty acids);ko00780(Biotin metabolism);ko00061(Fatty acid biosynthesis)
TRINITY_DN136569_c2_g2	PREDICTED: 3-oxoacyl-[acyl-carrier-protein] reductase 4 [Nelumbo nucifera]	1.20143	0.0166154	0.830608	0.0404638	GO:0016624(MF:oxidoreductase activity, acting on the aldehyde or oxo group of donors, disulfide as acceptor)	ko00620(Pyruvate metabolism);ko05230(Central carbon metabolism in cancer);ko04066(HIF-1 signaling pathway);ko04922(Glucagon signaling pathway);ko00020(Citrate cycle (TCA cycle));ko00010(Glycolysis / Gluconeogenesis)
TRINITY_DN142393_c0_g3	PREDICTED: pyruvate dehydrogenase E1 component subunit alpha-3, chloroplastic [Nelumbo nucifera]	1.3523	0.0153149	0.714781	0.0120427	GO:0008152(BP:metabolic process);GO:0003824(MF:catalytic activity)	ko00020(Citrate cycle (TCA cycle));ko00010(Glycolysis / Gluconeogenesis);ko04066(HIF-1 signaling pathway);ko05230(Central carbon metabolism in cancer);ko04922(Glucagon signaling pathway);ko00620(Pyruvate metabolism)
TRINITY_DN141823_c0_g5	PREDICTED: pyruvate dehydrogenase E1 component subunit beta-3, chloroplastic [Juglans regia];gi|1098808826|ref|XP_018810397.1| PREDICTED: pyruvate dehydrogenase E1 component subunit beta-3, chloroplastic [Juglans regia]	1.55502	0.00273704	0.803087	0.205118	-	ko00941(Flavonoid biosynthesis)
TRINITY_DN137723_c1_g9	probable chalcone--flavonone isomerase 3 [Durio zibethinus]	1.4592	0.00317087	0.890229	0.357155	GO:0009058(BP:biosynthetic process);GO:0016779(MF:nucleotidyltransferase activity)	ko00051(Fructose and mannose metabolism);ko00520(Amino sugar and nucleotide sugar metabolism)
TRINITY_DN137908_c0_g2	hypothetical protein AQUCO_00900877v1 [Aquilegia coerulea]	1.45242	0.0270918	0.84118	0.411041	-	-
TRINITY_DN139192_c0_g1	Rubber elongation factor [Macleaya cordata]	1.44773	0.0317663	0.908127	0.380888	GO:0003824(MF:catalytic activity)	-
TRINITY_DN128912_c2_g1	hypothetical protein CHLNCDRAFT_35292 [Chlorella variabilis];gi|307107592|gb|EFN55834.1| hypothetical protein CHLNCDRAFT_35292 [Chlorella variabilis]	1.43895	0.00955387	0.731314	0.292956	GO:0010466(BP:negative regulation of peptidase activity);GO:0030414(MF:peptidase inhibitor activity)	ko04970(Salivary secretion)
TRINITY_DN139558_c1_g7	hypothetical protein AQUCO_02800213v1 [Aquilegia coerulea]	1.43316	0.044779	0.768929	0.0708972	-	-
TRINITY_DN137987_c0_g1	Rubber elongation factor [Macleaya cordata]	1.38246	0.0137811	0.891234	0.204836	GO:0006807(BP:nitrogen compound metabolic process);GO:0016874(MF:ligase activity);GO:0000166(MF:nucleotide binding)	-
TRINITY_DN132465_c0_g1	hypothetical protein AQUCO_02600087v1 [Aquilegia coerulea]	1.34748	0.0478465	0.924001	0.679087	GO:0006520(BP:cellular amino acid metabolic process);GO:0055114(BP:oxidation-reduction process);GO:0016639(MF:oxidoreductase activity, acting on the CH-NH2 group of donors, NAD or NADP as acceptor)	ko04964(Proximal tubule bicarbonate reclamation);ko04217(Necroptosis);ko00250(Alanine, aspartate and glutamate metabolism);ko00910(Nitrogen metabolism);ko00220(Arginine biosynthesis);ko00471(D-Glutamine and D-glutamate metabolism)
TRINITY_DN140809_c0_g1	Glutamate/phenylalanine/leucine/valine dehydrogenase [Macleaya cordata]	1.33668	0.0189896	0.88311	0.222895	-	ko04141(Protein processing in endoplasmic reticulum)
TRINITY_DN140574_c0_g1	PREDICTED: 17.8 kDa class I heat shock protein-like [Nelumbo nucifera]	1.31696	0.0155221	0.872442	0.112678	GO:0009813(BP:flavonoid biosynthetic process);GO:0052696(BP:flavonoid glucuronidation);GO:0043231(CC:intracellular membrane-bounded organelle);GO:0080043(MF:quercetin 3-O-glucosyltransferase activity);GO:0080044(MF:quercetin 7-O-glucosyltransferase activity)	-
TRINITY_DN143340_c2_g2	hypothetical protein VITISV_008681 [Vitis vinifera]	1.31431	0.0245549	0.778959	0.0835205	GO:0010466(BP:negative regulation of peptidase activity);GO:0030414(MF:peptidase inhibitor activity)	-
TRINITY_DN137267_c1_g9	cysteine proteinase inhibitor B-like [Durio zibethinus]	1.30869	0.0378141	0.837657	0.125218	GO:0006223(BP:uracil salvage);GO:0004845(MF:uracil phosphoribosyltransferase activity)	ko00240(Pyrimidine metabolism)
TRINITY_DN138728_c2_g5	hypothetical protein BVC80_1821g93 [Macleaya cordata]	1.28098	0.00404408	0.8512	0.0350087	GO:0055114(BP:oxidation-reduction process);GO:0016491(MF:oxidoreductase activity)	-
TRINITY_DN137804_c2_g2	PREDICTED: peroxiredoxin-2E-1, chloroplastic [Nelumbo nucifera]	1.27248	0.048057	0.916232	0.403199	-	ko00640(Propanoate metabolism);ko00061(Fatty acid biosynthesis);ko00620(Pyruvate metabolism);ko00720(Carbon fixation pathways in prokaryotes)
TRINITY_DN139986_c2_g9	Biotin/lipoyl attachment [Macleaya cordata]	1.26622	0.040538	0.836747	0.00868227	GO:0008233(MF:peptidase activity)	-
TRINITY_DN143046_c0_g2	PREDICTED: aspartyl protease family protein At5g10770-like [Nelumbo nucifera]	1.2639	0.0488166	0.94276	0.648014	GO:0016787(MF:hydrolase activity)	ko00410(beta-Alanine metabolism);ko00640(Propanoate metabolism);ko00280(Valine, leucine and isoleucine degradation)
TRINITY_DN139450_c1_g5	hypothetical protein BVC80_1313g10 [Macleaya cordata]	1.24604	0.0433879	0.882884	0.152031	GO:0005975(BP:carbohydrate metabolic process);GO:0003824(MF:catalytic activity)	ko00030(Pentose phosphate pathway)
TRINITY_DN140925_c0_g3	Transaldolase [Macleaya cordata]	1.24164	0.0178907	0.969986	0.693224	-	ko04918(Thyroid hormone synthesis);ko04141(Protein processing in endoplasmic reticulum);ko03060(Protein export);ko05020(Prion diseases)
TRINITY_DN142707_c1_g3	PREDICTED: luminal-binding protein 4-like [Nelumbo nucifera]	1.22683	0.0391971	0.935146	0.547511	GO:0009992(BP:cellular water homeostasis);GO:0034220(BP:ion transmembrane transport);GO:0009705(CC:plant-type vacuole membrane);GO:0005887(CC:integral component of plasma membrane);GO:0042807(CC:central vacuole);GO:0015254(MF:glycerol channel activity);GO:0015250(MF:water channel activity)	-
TRINITY_DN152067_c0_g1	PREDICTED: aquaporin TIP3-1 [Elaeis guineensis]	1.2267	0.0342572	0.962414	0.685431	GO:0016829(MF:lyase activity)	ko04066(HIF-1 signaling pathway);ko03018(RNA degradation);ko00010(Glycolysis / Gluconeogenesis);ko00680(Methane metabolism)
TRINITY_DN140548_c1_g6	Enolase [Macleaya cordata]	1.225	0.0199984	0.820895	0.0506564	GO:0009058(BP:biosynthetic process);GO:0030170(MF:pyridoxal phosphate binding);GO:0008483(MF:transaminase activity)	ko00710(Carbon fixation in photosynthetic organisms);ko00250(Alanine, aspartate and glutamate metabolism);ko00220(Arginine biosynthesis)
TRINITY_DN135466_c1_g9	Aminotransferase [Macleaya cordata]	1.21238	0.00944767	0.898646	0.0804146	GO:0009852(BP:auxin catabolic process);GO:0051213(MF:dioxygenase activity)	-
TRINITY_DN138046_c0_g6	PREDICTED: 2-oxoglutarate-dependent dioxygenase DAO-like [Nelumbo nucifera]	1.2358	0.017724	1.03099	0.711022	-	-
TRINITY_DN140579_c0_g6	PREDICTED: uncharacterized protein LOC105788735 [Gossypium raimondii];gi|763752541|gb|KJB19929.1| hypothetical protein B456_003G125200 [Gossypium raimondii]	1.29449	0.012495	1.0226	0.88777	GO:0006450(BP:regulation of translational fidelity);GO:0005829(CC:cytosol);GO:0002161(MF:aminoacyl-tRNA editing activity)	-
TRINITY_DN136116_c4_g4	PREDICTED: prolyl-tRNA synthetase associated domain-containing protein 1 [Nelumbo nucifera]	1.25271	0.0427321	1.00327	0.963504	GO:0006633(BP:fatty acid biosynthetic process);GO:2001295(BP:malonyl-CoA biosynthetic process);GO:0009317(CC:acetyl-CoA carboxylase complex);GO:0009570(CC:chloroplast stroma);GO:0003989(MF:acetyl-CoA carboxylase activity);GO:0008270(MF:zinc ion binding);GO:0005524(MF:ATP binding)	ko00640(Propanoate metabolism);ko00720(Carbon fixation pathways in prokaryotes);ko00620(Pyruvate metabolism);ko00061(Fatty acid biosynthesis)
TRINITY_DN141061_c2_g4	acetyl-CoA carboxylase beta subunit (chloroplast) [Akebia trifoliata];gi|985482892|gb|AMD08113.1| acetyl-CoA carboxylase beta subunit (chloroplast) [Akebia trifoliata]	1.22347	0.00387908	1.01248	0.934818	-	-
TRINITY_DN139878_c0_g4	Leucine-rich repeat [Macleaya cordata]	1.223	0.0122312	1.12158	0.392834	GO:0005509(MF:calcium ion binding)	ko04626(Plant-pathogen interaction)
TRINITY_DN140848_c6_g1	EF-hand domain [Macleaya cordata]	0.828606	0.00488197	0.96236	0.580612	GO:0016020(CC:membrane)	-
TRINITY_DN135949_c3_g4	PREDICTED: hypersensitive-induced response protein 1 [Nelumbo nucifera];gi|719965433|ref|XP_010256447.1| PREDICTED: hypersensitive-induced response protein 1 [Nelumbo nucifera];gi|1102729203|ref|XP_019053459.1| PREDICTED: hypersensitive-induced response protein 1 [Nelumbo nucifera];gi|1102729205|ref|XP_019053461.1| PREDICTED: hypersensitive-induced response protein 1 [Nelumbo nucifera]	0.827175	0.0387132	0.933019	0.556168	GO:0006412(BP:translation);GO:0005840(CC:ribosome);GO:0003735(MF:structural constituent of ribosome)	ko03010(Ribosome)
TRINITY_DN137440_c4_g3	PREDICTED: 60S ribosomal protein L22-2-like [Nelumbo nucifera]	0.822799	0.000678608	0.98908	0.925973	GO:0008104(BP:protein localization)	-
TRINITY_DN132901_c0_g1	Mitochondrial inner membrane translocase subunit Tim17/Tim22/Tim23/peroxisomal protein PMP24 [Macleaya cordata]	0.816373	0.00534711	0.903508	0.247177	-	-
TRINITY_DN138289_c2_g7	hypothetical protein AQUCO_02300005v1 [Aquilegia coerulea]	0.814779	0.0402786	1.10038	0.618065	GO:0015976(BP:carbon utilization);GO:0008270(MF:zinc ion binding);GO:0004089(MF:carbonate dehydratase activity)	ko00910(Nitrogen metabolism)
TRINITY_DN138875_c6_g1	Carbonic anhydrase [Macleaya cordata]	0.812628	0.0270734	1.14603	0.0830865	GO:0006069(BP:ethanol oxidation);GO:0008270(MF:zinc ion binding);GO:0051903(MF:S-(hydroxymethyl)glutathione dehydrogenase activity)	-
TRINITY_DN143143_c0_g2	S-(hydroxymethyl)glutathione dehydrogenase-like [Quercus suber];gi|1336340694|gb|POE75603.1| s-(hydroxymethyl)glutathione dehydrogenase [Quercus suber]	0.811182	0.0190387	1.03951	0.594771	GO:0031224(CC:intrinsic component of membrane);GO:0071944(CC:cell periphery)	-
TRINITY_DN140579_c0_g1	plasmodesmata callose-binding protein 3 [Capsicum baccatum]	0.809598	0.031696	1.32391	0.00430844	-	-
TRINITY_DN73089_c0_g1	hypothetical protein AQUCO_00900675v1 [Aquilegia coerulea]	0.805516	0.0422807	1.79177	0.0016814	GO:0055085(BP:transmembrane transport);GO:0016021(CC:integral component of membrane);GO:0004427(MF:inorganic diphosphatase activity);GO:0009678(MF:hydrogen-translocating pyrophosphatase activity)	-
TRINITY_DN138938_c0_g6	hypothetical protein CDL15_Pgr020197 [Punica granatum]	0.804222	0.0168	0.992696	0.895782	GO:0016021(CC:integral component of membrane)	ko04977(Vitamin digestion and absorption)
TRINITY_DN142657_c2_g3	LMBR1-like membrane protein [Macleaya cordata]	0.803602	0.0148503	1.04532	0.527259	-	ko00230(Purine metabolism)
TRINITY_DN138484_c1_g2	hypothetical protein AQUCO_02300203v1 [Aquilegia coerulea]	0.803361	0.0255362	1.14183	0.13669	-	-
TRINITY_DN138718_c0_g1	#N/A	0.792907	0.0187856	0.901759	0.0164813	-	-
TRINITY_DN113972_c0_g1	PREDICTED: 14 kDa proline-rich protein DC2.15-like [Elaeis guineensis]	0.791832	0.0462449	1.73795	0.000451962	GO:0016020(CC:membrane);GO:0009506(CC:plasmodesma);GO:0048046(CC:apoplast);GO:0005618(CC:cell wall);GO:0009507(CC:chloroplast)	-
TRINITY_DN134662_c0_g4	PREDICTED: DNA-damage-repair/toleration protein DRT100-like [Nelumbo nucifera]	0.790408	0.00912383	1.53848	0.0227201	GO:0006904(BP:vesicle docking involved in exocytosis);GO:0009306(BP:protein secretion);GO:0007264(BP:small GTPase mediated signal transduction);GO:0005622(CC:intracellular);GO:0005525(MF:GTP binding)	-
TRINITY_DN140679_c1_g4	Small GTPase superfamily [Macleaya cordata]	0.784623	0.0452928	0.722447	0.0829316	GO:0009536(CC:plastid);GO:0003824(MF:catalytic activity)	ko00270(Cysteine and methionine metabolism);ko00450(Selenocompound metabolism);ko00920(Sulfur metabolism)
TRINITY_DN135497_c1_g2	hypothetical protein AQUCO_00200683v1 [Aquilegia coerulea]	0.769437	0.0315794	0.949481	0.711368	GO:0016020(CC:membrane)	-
TRINITY_DN126058_c0_g1	PREDICTED: probable ascorbate-specific transmembrane electron transporter 1 [Nelumbo nucifera]	0.756637	0.0255568	0.820321	0.039804	GO:0008652(BP:cellular amino acid biosynthetic process);GO:0044446(CC:intracellular organelle part);GO:0009507(CC:chloroplast);GO:0005488(MF:binding);GO:0016620(MF:oxidoreductase activity, acting on the aldehyde or oxo group of donors, NAD or NADP as acceptor)	ko00220(Arginine biosynthesis)
TRINITY_DN140016_c0_g3	PREDICTED: probable N-acetyl-gamma-glutamyl-phosphate reductase, chloroplastic [Nelumbo nucifera]	0.749179	0.0114003	0.927577	0.150448	GO:0006810(BP:transport);GO:0016021(CC:integral component of membrane);GO:0005215(MF:transporter activity)	-
TRINITY_DN139272_c1_g1	hypothetical protein B456_003G158100 [Gossypium raimondii]	0.736152	0.00833785	1.10904	0.615672	GO:0009664(BP:plant-type cell wall organization);GO:0005576(CC:extracellular region);GO:0016020(CC:membrane);GO:0005618(CC:cell wall)	-
TRINITY_DN135840_c4_g6	hypothetical protein GLYMA_11G160000 [Glycine max]	0.727484	0.00509341	1.03182	0.736442	GO:0009941(CC:chloroplast envelope)	-
TRINITY_DN116828_c0_g1	hypothetical protein BVC80_1835g382 [Macleaya cordata]	0.717694	0.0399921	1.04509	0.683538	-	-
TRINITY_DN139005_c2_g7	hypothetical protein BVC80_717g7 [Macleaya cordata]	0.693578	0.0438353	1.2006	0.370355	GO:0016020(CC:membrane)	-
TRINITY_DN139869_c0_g7	Plant lipid transfer protein/Par allergen [Macleaya cordata]	0.690563	0.010696	2.31769	0.00846197	-
TRINITY_DN139808_c4_g8	Gibberellin regulated protein [Macleaya cordata]	0.379334	0.000340991	3.73201	0.0021344	-	-
TRINITY_DN138193_c0_g4	hypothetical protein BVC80_1223g11 [Macleaya cordata]	1.04852	0.2863	0.79921	0.00367627	GO:0009231(BP:riboflavin biosynthetic process);GO:0009349(CC:riboflavin synthase complex);GO:0009570(CC:chloroplast stroma);GO:0016740(MF:transferase activity);GO:0000906(MF:6,7-dimethyl-8-ribityllumazine synthase activity)	ko00740(Riboflavin metabolism)
TRINITY_DN138909_c2_g7	PREDICTED: zeaxanthin epoxidase, chloroplastic isoform X1 [Nelumbo nucifera]	1.10354	0.0662747	0.793116	0.0283392	GO:0009507(CC:chloroplast)	-
TRINITY_DN139078_c2_g1	Glycoside hydrolase [Macleaya cordata]	1.27411	0.384978	5.24787	0.00368933	GO:0005975(BP:carbohydrate metabolic process);GO:0071554(BP:cell wall organization or biogenesis);GO:0016787(MF:hydrolase activity)	-
TRINITY_DN140516_c2_g2	actin, partial [Capsicum annuum]	0.984905	0.910089	3.804	0.00608716	GO:0005524(MF:ATP binding)	-
TRINITY_DN143028_c0_g1	PREDICTED: pectinesterase [Nelumbo nucifera]	1.29115	0.502858	3.75914	0.0201365	GO:0071555(BP:cell wall organization);GO:0016020(CC:membrane);GO:0016788(MF:hydrolase activity, acting on ester bonds)	ko00040(Pentose and glucuronate interconversions)
TRINITY_DN142420_c2_g5	PREDICTED: LOW QUALITY PROTEIN: uncharacterized protein LOC104590182 [Nelumbo nucifera]	0.852338	0.14496	2.67856	0.00210288	-	-
TRINITY_DN138804_c1_g1	PREDICTED: S-norcoclaurine synthase 1-like [Nelumbo nucifera];gi|1034220361|gb|ANI26411.1| S-norcoclaurine synthase [Nelumbo nucifera]	0.789251	0.450728	2.38303	0.00182335	-	-
TRINITY_DN141965_c0_g7	Triosephosphate isomerase [Macleaya cordata]	0.915789	0.472314	2.32835	0.0209638	GO:0006096(BP:glycolytic process);GO:0004807(MF:triose-phosphate isomerase activity)	-
TRINITY_DN139684_c2_g2	Grip22-like protein [Vitis quinquangularis]	0.969665	0.652315	2.23754	0.00219445	-	-
TRINITY_DN140072_c1_g3	hypothetical protein M569_03235, partial [Genlisea aurea]	1.26693	0.5396	2.17246	0.0246929	GO:0044238(BP:primary metabolic process);GO:0044260(BP:cellular macromolecule metabolic process);GO:0005739(CC:mitochondrion);GO:0016747(MF:transferase activity, transferring acyl groups other than amino-acyl groups)	-
TRINITY_DN140504_c0_g1	endoglucanase 1-like [Quercus suber];gi|1336377008|gb|POF03587.1| endoglucanase 1 [Quercus suber]	0.968406	0.892215	2.1688	0.0208282	GO:0030245(BP:cellulose catabolic process);GO:0008810(MF:cellulase activity)	-
TRINITY_DN141676_c1_g1	Bifunctional inhibitor/plant lipid transfer protein/seed storage helical domain [Macleaya cordata]	0.690366	0.0925614	2.09212	0.0214077	-	-
TRINITY_DN137440_c4_g2	Pectinesterase inhibitor domain [Macleaya cordata]	1.00279	0.984167	2.07312	0.00320626	-	-
TRINITY_DN143081_c1_g2	PREDICTED: expansin-like A1 [Nelumbo nucifera]	0.916944	0.514693	2.06397	0.0212517	GO:0016020(CC:membrane);GO:0009506(CC:plasmodesma);GO:0009505(CC:plant-type cell wall)	-
TRINITY_DN142154_c3_g4	PREDICTED: probable galactinol--sucrose galactosyltransferase 6 isoform X1 [Nelumbo nucifera]	1.04993	0.668887	2.01247	0.0203062	GO:0003824(MF:catalytic activity)	-
TRINITY_DN142966_c1_g1	hypothetical protein AQUCO_01600049v1, partial [Aquilegia coerulea]	0.996113	0.984383	2.01168	0.00128962	-	-
TRINITY_DN143057_c1_g1	Glutathione S-transferase [Macleaya cordata]	1.08304	0.745868	2.00869	0.0210214	GO:0006749(BP:glutathione metabolic process);GO:0010731(BP:protein glutathionylation);GO:0005737(CC:cytoplasm);GO:0004364(MF:glutathione transferase activity)	-
TRINITY_DN140865_c1_g2	Pectinesterase inhibitor domain [Macleaya cordata]	1.01321	0.914745	1.87982	0.00187744	-	-
TRINITY_DN138072_c1_g1	PREDICTED: L-ascorbate oxidase homolog [Nelumbo nucifera]	1.00547	0.963246	1.87412	0.000823489	GO:0055114(BP:oxidation-reduction process);GO:0009506(CC:plasmodesma);GO:0009505(CC:plant-type cell wall);GO:0016722(MF:oxidoreductase activity, oxidizing metal ions);GO:0005507(MF:copper ion binding)	-
TRINITY_DN137998_c0_g1	hypothetical protein AQUCO_00900836v1 [Aquilegia coerulea]	1.45404	0.0599389	1.85425	0.00265964	-	-
TRINITY_DN143250_c1_g6	PREDICTED: probable pectate lyase 8 [Nelumbo nucifera]	1.01696	0.938929	1.85369	0.00332114	GO:0016829(MF:lyase activity)	ko00040(Pentose and glucuronate interconversions);ko02024(Quorum sensing)
TRINITY_DN137340_c2_g11	cysteine proteinase inhibitor 5-like [Herrania umbratica]	1.24005	0.513757	1.83878	0.0450108	-	-
TRINITY_DN140874_c2_g2	succinate dehydrogenase [Trifolium pratense];gi|1335256001|gb|PNY14953.1| succinate dehydrogenase [Trifolium pratense]	0.913721	0.639223	1.83479	0.00368708	GO:0006099(BP:tricarboxylic acid cycle);GO:0022900(BP:electron transport chain);GO:0005743(CC:mitochondrial inner membrane);GO:0050660(MF:flavin adenine dinucleotide binding);GO:0008177(MF:succinate dehydrogenase (ubiquinone) activity)	-
TRINITY_DN142642_c1_g5	PREDICTED: uncharacterized protein LOC100258445 [Vitis vinifera]	0.86093	0.211062	1.79834	0.0377019	GO:0005618(CC:cell wall);GO:0005886(CC:plasma membrane)	-
TRINITY_DN140417_c2_g10	PREDICTED: hydroxysteroid dehydrogenase-like protein 2 [Nelumbo nucifera]	0.746871	0.0522127	1.74876	0.0185649	GO:0009735(BP:response to cytokinin);GO:0046487(BP:glyoxylate metabolic process);GO:0009845(BP:seed germination);GO:0005777(CC:peroxisome)	-
TRINITY_DN138388_c1_g1	PREDICTED: beta-galactosidase 3-like [Nelumbo nucifera]	0.969726	0.882341	1.74812	0.0288461	GO:0008152(BP:metabolic process);GO:0005773(CC:vacuole);GO:0005618(CC:cell wall);GO:0004565(MF:beta-galactosidase activity)	-
TRINITY_DN138645_c1_g2	#N/A	1.1217	0.355272	1.73181	0.00799734	-	-
TRINITY_DN136915_c5_g4	PREDICTED: probable pectate lyase 8 [Daucus carota subsp. sativus];gi|1021027419|gb|KZM85206.1| hypothetical protein DCAR_027372 [Daucus carota subsp. sativus]	0.764702	0.184035	1.71339	0.0255424	GO:0045490(BP:pectin catabolic process);GO:0046872(MF:metal ion binding);GO:0030570(MF:pectate lyase activity)	-
TRINITY_DN140086_c2_g3	hypothetical protein POPTR_0019s01630g [Populus trichocarpa];gi|566254614|ref|XP_006387534.1| hypothetical protein POPTR_0879s00200g [Populus trichocarpa];gi|1334273395|gb|PNS89736.1| hypothetical protein POPTR_019G002400v3 [Populus trichocarpa]	1.04909	0.793864	1.7015	0.028903	-	-
TRINITY_DN141877_c0_g5	PREDICTED: histone H2B.3-like [Ziziphus jujuba]	0.911641	0.402087	1.69003	0.0208622	GO:0000786(CC:nucleosome);GO:0005634(CC:nucleus);GO:0046982(MF:protein heterodimerization activity);GO:0003677(MF:DNA binding)	ko05322(Systemic lupus erythematosus);ko05203(Viral carcinogenesis);ko05034(Alcoholism)
TRINITY_DN135902_c2_g1	36.4 kDa proline-rich protein-like isoform X2 [Carica papaya]	0.74492	0.0747594	1.6782	0.00310716	-	-
TRINITY_DN136333_c1_g2	Glycoside hydrolase [Macleaya cordata]	1.04705	0.826662	1.66907	0.00807572	GO:0042547(BP:cell wall modification involved in multidimensional cell growth);GO:0000272(BP:polysaccharide catabolic process);GO:0005576(CC:extracellular region);GO:0009507(CC:chloroplast);GO:0008810(MF:cellulase activity)	ko00500(Starch and sucrose metabolism)
TRINITY_DN142119_c1_g3	Glycoside hydrolase [Macleaya cordata]	1.05282	0.723725	1.66813	0.0110948	-	ko00052(Galactose metabolism);ko00500(Starch and sucrose metabolism)
TRINITY_DN142985_c0_g3	hypothetical protein AQUCO_05400139v1 [Aquilegia coerulea]	0.852154	0.255561	1.65521	0.0248829	-	-
TRINITY_DN139148_c1_g2	Plant lipid transfer protein/Par allergen [Macleaya cordata]	0.926566	0.496864	1.6137	0.00180239	-	-
TRINITY_DN139982_c1_g3	PREDICTED: histone H1-like [Solanum tuberosum]	1.05682	0.572198	1.61094	0.00901587	-	-
TRINITY_DN141370_c1_g2	chloroplast envelope quinone oxidoreductase homolog isoform X2 [Hevea brasiliensis]	0.993016	0.884737	1.60931	0.00229228	GO:0044434(CC:chloroplast part);GO:0016020(CC:membrane)	-
TRINITY_DN16105_c0_g1	#N/A	0.950735	0.621842	1.6071	0.0080383	-	-
TRINITY_DN140816_c0_g1	Amino acid transporter [Macleaya cordata]	1.1469	0.480937	1.59058	0.0342766	GO:0016021(CC:integral component of membrane)	-
TRINITY_DN134940_c2_g1	hypothetical protein CISIN_1g015702mg [Citrus sinensis]	0.901446	0.495476	1.54687	0.0406937	GO:0016829(MF:lyase activity)	-
TRINITY_DN142016_c1_g1	Ubiquitin fusion degradation protein UFD [Parasponia andersonii]	1.16312	0.146118	1.53814	0.00749593	GO:0006511(BP:ubiquitin-dependent protein catabolic process)	ko04141(Protein processing in endoplasmic reticulum)
TRINITY_DN135256_c1_g4	hypothetical protein AQUCO_04600029v1 [Aquilegia coerulea]	0.91329	0.07926	1.53621	0.000507787	GO:0016020(CC:membrane)	-
TRINITY_DN136370_c0_g3	PREDICTED: phosphoprotein ECPP44-like [Gossypium arboreum];gi|728845051|gb|KHG24494.1| Phosphoprotein ECPP44 [Gossypium arboreum]	0.99311	0.975717	1.53435	0.0284243	-	-
TRINITY_DN140050_c0_g2	EGF-like calcium-binding domain [Macleaya cordata]	0.827667	0.0848421	1.53156	0.0221053	GO:0016021(CC:integral component of membrane);GO:0005509(MF:calcium ion binding)	-
TRINITY_DN140449_c0_g1	PREDICTED: alcohol dehydrogenase [Populus euphratica]	1.25724	0.0667182	1.52583	0.0135592	GO:0055114(BP:oxidation-reduction process);GO:0008270(MF:zinc ion binding);GO:0016491(MF:oxidoreductase activity)	ko00592(alpha-Linolenic acid metabolism);ko00350(Tyrosine metabolism);ko00071(Fatty acid degradation);ko00010(Glycolysis / Gluconeogenesis)
TRINITY_DN139955_c0_g2	protein P21-like [Quercus suber]	1.13233	0.356625	1.52579	0.0198355	-	-
TRINITY_DN141378_c3_g3	PREDICTED: GPI-anchored protein LORELEI-like [Nelumbo nucifera]	0.785716	0.153915	1.5118	0.0408489	GO:0016021(CC:integral component of membrane)	-
TRINITY_DN142355_c0_g1	LRR receptor-like serine/threonine-protein kinase GSO1 [Quercus suber]	0.988484	0.943646	1.51059	0.0223998	-	-
TRINITY_DN134828_c1_g7	PREDICTED: ubiquitin-conjugating enzyme E2 7 isoform X1 [Elaeis guineensis]	0.878234	0.359592	1.50511	0.0356867	GO:0016567(BP:protein ubiquitination);GO:0005737(CC:cytoplasm);GO:0031625(MF:ubiquitin protein ligase binding);GO:0061630(MF:ubiquitin protein ligase activity);GO:0005524(MF:ATP binding)	ko04141(Protein processing in endoplasmic reticulum);ko05012(Parkinson disease);ko04120(Ubiquitin mediated proteolysis)
TRINITY_DN134267_c0_g1	Glycoside hydrolase [Macleaya cordata]	1.25848	0.253566	1.47987	0.0294156	GO:0008152(BP:metabolic process);GO:0016787(MF:hydrolase activity)	ko00500(Starch and sucrose metabolism)
TRINITY_DN35009_c0_g1	uncharacterized protein LOC107604664 [Arachis ipaensis]	0.985228	0.798603	1.47784	0.00756045	-	-
TRINITY_DN138859_c0_g11	NADH dehydrogenase [ubiquinone] iron-sulfur protein 7, mitochondrial [Lactuca sativa];gi|1322372498|gb|PLY73204.1| hypothetical protein LSAT_5X48820 [Lactuca sativa]	0.941161	0.44007	1.47005	0.0120808	GO:0005739(CC:mitochondrion);GO:0046872(MF:metal ion binding);GO:0016491(MF:oxidoreductase activity);GO:0051536(MF:iron-sulfur cluster binding)	ko05016(Huntington disease);ko05012(Parkinson disease);ko04723(Retrograde endocannabinoid signaling);ko04714(Thermogenesis);ko05010(Alzheimer disease);ko04932(Non-alcoholic fatty liver disease (NAFLD));ko00190(Oxidative phosphorylation)
TRINITY_DN138635_c1_g6	PREDICTED: multicopper oxidase LPR1 isoform X2 [Theobroma cacao]	1.16612	0.302798	1.46591	0.0381592	GO:0016491(MF:oxidoreductase activity)	-
TRINITY_DN140686_c0_g1	Lipid-binding serum glycoprotein [Macleaya cordata]	0.985138	0.890738	1.44491	0.0201911	-	-
TRINITY_DN142215_c0_g1	Beta-lactamase-like [Macleaya cordata]	0.970182	0.724947	1.4433	0.0172891	GO:0016787(MF:hydrolase activity)	ko04310(Wnt signaling pathway)
TRINITY_DN138487_c0_g3	hypothetical protein BVC80_1787g160 [Macleaya cordata]	0.938567	0.491573	1.44221	0.0382071	-	-
TRINITY_DN135842_c2_g1	hypothetical protein AQUCO_01300645v1 [Aquilegia coerulea]	0.898379	0.275708	1.43512	0.00442475	GO:0009506(CC:plasmodesma);GO:0009505(CC:plant-type cell wall)	-
TRINITY_DN140631_c4_g1	PREDICTED: rhodanese-like domain-containing protein 4, chloroplastic [Nelumbo nucifera]	0.903153	0.397471	1.43256	0.0216669	-	-
TRINITY_DN141560_c2_g2	hypothetical protein AQUCO_00100077v1 [Aquilegia coerulea]	0.966253	0.661747	1.42318	0.0408135	GO:0003824(MF:catalytic activity)	ko00983(Drug metabolism - other enzymes);ko00240(Pyrimidine metabolism)
TRINITY_DN134385_c0_g1	hypothetical protein AQUCO_03400164v1 [Aquilegia coerulea]	0.980165	0.757329	1.41405	0.00758739	-	-
TRINITY_DN138370_c4_g5	Ovarian tumor, otubain [Corchorus olitorius]	1.06426	0.577131	1.39791	0.0278921	-	ko04141(Protein processing in endoplasmic reticulum)
TRINITY_DN140437_c1_g4	PREDICTED: mitochondrial-processing peptidase subunit alpha-like [Nelumbo nucifera]	1.02502	0.732777	1.39526	0.0263596	GO:0006627(BP:protein processing involved in protein targeting to mitochondrion);GO:0005743(CC:mitochondrial inner membrane);GO:0008270(MF:zinc ion binding);GO:0004222(MF:metalloendopeptidase activity)	-
TRINITY_DN140024_c2_g2	PREDICTED: actin, muscle, partial [Phoenix dactylifera]	0.745328	0.305507	1.39224	0.0101974	GO:0090131(BP:mesenchyme migration);GO:0010628(BP:positive regulation of gene expression);GO:0005737(CC:cytoplasm);GO:0030027(CC:lamellipodium);GO:0030175(CC:filopodium);GO:0044297(CC:cell body);GO:0005524(MF:ATP binding)	-
TRINITY_DN141855_c0_g1	X8 [Macleaya cordata]	0.953835	0.610658	1.38906	0.0385869	GO:0031224(CC:intrinsic component of membrane);GO:0071944(CC:cell periphery)	-
TRINITY_DN140400_c1_g8	PREDICTED: uncharacterized protein LOC104591764 [Nelumbo nucifera];gi|719978140|ref|XP_010249075.1| PREDICTED: uncharacterized protein LOC104591764 [Nelumbo nucifera]	1.02084	0.807687	1.38822	0.0257146	-	-
TRINITY_DN141905_c1_g1	AMP-dependent synthetase/ligase [Macleaya cordata]	0.973649	0.820879	1.37286	0.0425411	GO:0003824(MF:catalytic activity)	ko00940(Phenylpropanoid biosynthesis);ko00360(Phenylalanine metabolism);ko00130(Ubiquinone and other terpenoid-quinone biosynthesis)
TRINITY_DN141029_c2_g8	hypothetical protein AQUCO_08300033v1 [Aquilegia coerulea]	1.00624	0.92998	1.36716	0.036069	GO:0009812(BP:flavonoid metabolic process);GO:0035251(MF:UDP-glucosyltransferase activity)	-
TRINITY_DN138034_c2_g8	hypothetical protein AQUCO_01400261v1 [Aquilegia coerulea]	0.921901	0.309924	1.36641	0.00503337	GO:0008152(BP:metabolic process);GO:0005773(CC:vacuole);GO:0005618(CC:cell wall);GO:0004565(MF:beta-galactosidase activity)	-
TRINITY_DN136186_c3_g2	ubiquitin, partial [Vernicia fordii]	0.914588	0.617643	1.36102	0.0301413	GO:0005737(CC:cytoplasm)	ko03320(PPAR signaling pathway)
TRINITY_DN139758_c2_g1	DREPP plasma membrane protein [Medicago truncatula];gi|217071356|gb|ACJ84038.1| unknown [Medicago truncatula];gi|388500800|gb|AFK38466.1| unknown [Medicago truncatula];gi|657397605|gb|KEH37321.1| DREPP plasma membrane protein [Medicago truncatula]	0.988435	0.85025	1.36089	0.005781	GO:0051716(BP:cellular response to stimulus);GO:0046658(CC:anchored component of plasma membrane)	-
TRINITY_DN139655_c0_g1	hypothetical protein BVC80_8333g5 [Macleaya cordata]	1.09706	0.278661	1.35664	0.025525	-	-
TRINITY_DN135890_c0_g4	PREDICTED: 40S ribosomal protein S26 [Elaeis guineensis]	0.910116	0.038157	1.35454	0.00651612	GO:0006412(BP:translation);GO:0022627(CC:cytosolic small ribosomal subunit);GO:0003729(MF:mRNA binding);GO:0003735(MF:structural constituent of ribosome)	ko03010(Ribosome)
TRINITY_DN135314_c5_g4	Phospholipase C [Macleaya cordata]	1.05746	0.51432	1.34005	0.0348274	GO:0006629(BP:lipid metabolic process);GO:0008081(MF:phosphoric diester hydrolase activity)	-
TRINITY_DN142585_c0_g1	PREDICTED: 3-ketoacyl-CoA thiolase 2, peroxisomal [Gossypium hirsutum]	1.08727	0.394837	1.3383	0.0308025	GO:0008152(BP:metabolic process);GO:0003988(MF:acetyl-CoA C-acyltransferase activity)	ko04146(Peroxisome);ko00592(alpha-Linolenic acid metabolism);ko03320(PPAR signaling pathway);ko00280(Valine, leucine and isoleucine degradation);ko01040(Biosynthesis of unsaturated fatty acids);ko00071(Fatty acid degradation)
TRINITY_DN135263_c1_g4	Inosine/uridine-preferring nucleoside hydrolase domain [Macleaya cordata]	1.04462	0.563509	1.33754	0.0464411	-	ko00240(Pyrimidine metabolism);ko00760(Nicotinate and nicotinamide metabolism)
TRINITY_DN140428_c1_g7	hypothetical protein AQUCO_02500263v1 [Aquilegia coerulea]	1.01703	0.818266	1.33158	0.0171819	GO:0055114(BP:oxidation-reduction process);GO:0016021(CC:integral component of membrane);GO:0016491(MF:oxidoreductase activity)	ko00960(Tropane, piperidine and pyridine alkaloid biosynthesis)
TRINITY_DN135078_c1_g1	endochitinase [Persea americana]	1.0199	0.740696	1.32971	0.00472779	GO:0009056(BP:catabolic process);GO:0043170(BP:macromolecule metabolic process);GO:0016798(MF:hydrolase activity, acting on glycosyl bonds)	ko00520(Amino sugar and nucleotide sugar metabolism);ko04016(MAPK signaling pathway - plant)
TRINITY_DN139558_c1_g12	hypothetical protein GOBAR_AA04508 [Gossypium barbadense]	1.04856	0.579443	1.3213	0.0077228	GO:0006413(BP:translational initiation);GO:0006452(BP:translational frameshifting);GO:0045905(BP:positive regulation of translational termination);GO:0045901(BP:positive regulation of translational elongation);GO:0003743(MF:translation initiation factor activity);GO:0003746(MF:translation elongation factor activity);GO:0043022(MF:ribosome binding)	-
TRINITY_DN138652_c0_g3	PREDICTED: probable polygalacturonase [Nelumbo nucifera]	0.998648	0.984108	1.31786	0.0233685	GO:0008152(BP:metabolic process);GO:0016798(MF:hydrolase activity, acting on glycosyl bonds)	-
TRINITY_DN143053_c1_g6	Granulin [Macleaya cordata]	0.999186	0.99034	1.31136	0.0140129	GO:0051603(BP:proteolysis involved in cellular protein catabolic process);GO:0005615(CC:extracellular space);GO:0005764(CC:lysosome);GO:0004197(MF:cysteine-type endopeptidase activity)	-
TRINITY_DN116413_c0_g1	Cell division protein FtsZ [Macleaya cordata]	1.03242	0.198331	1.31091	0.0126281	GO:0007017(BP:microtubule-based process);GO:0005737(CC:cytoplasm);GO:0005874(CC:microtubule);GO:0005525(MF:GTP binding);GO:0003924(MF:GTPase activity)	ko04112(Cell cycle - Caulobacter)
TRINITY_DN138670_c1_g1	SEC7-like [Macleaya cordata]	1.02805	0.773816	1.30933	0.0240869	GO:0007155(BP:cell adhesion);GO:0000911(BP:cytokinesis by cell plate formation);GO:0032509(BP:endosome transport via multivesicular body sorting pathway);GO:0010311(BP:lateral root formation);GO:0010540(BP:basipetal auxin transport);GO:0009826(BP:unidimensional cell growth);GO:0001736(BP:establishment of planar polarity);GO:0032012(BP:regulation of ARF protein signal transduction);GO:0048765(BP:r…	ko04144(Endocytosis)
TRINITY_DN138187_c1_g3	unnamed protein product, partial [Vitis vinifera]	1.0422	0.471858	1.30697	0.0412525	GO:0009992(BP:cellular water homeostasis);GO:0006833(BP:water transport);GO:0015793(BP:glycerol transport);GO:0034220(BP:ion transmembrane transport);GO:0009506(CC:plasmodesma);GO:0005887(CC:integral component of plasma membrane);GO:0005773(CC:vacuole);GO:0015254(MF:glycerol channel activity);GO:0015250(MF:water channel activity)	-
TRINITY_DN138707_c0_g3	PREDICTED: 60S ribosomal protein L35a-3 [Eucalyptus grandis];gi|629096071|gb|KCW62066.1| hypothetical protein EUGRSUZ_H04737 [Eucalyptus grandis]	0.957864	0.662839	1.30618	0.0244146	GO:0042273(BP:ribosomal large subunit biogenesis);GO:0002181(BP:cytoplasmic translation);GO:0022625(CC:cytosolic large ribosomal subunit);GO:0003735(MF:structural constituent of ribosome)	ko03010(Ribosome)
TRINITY_DN142288_c1_g6	predicted protein [Hordeum vulgare subsp. vulgare]	0.998966	0.988737	1.29898	0.0149106	GO:0016787(MF:hydrolase activity)	-
TRINITY_DN142492_c2_g4	PREDICTED: universal stress protein PHOS34 [Nelumbo nucifera]	0.947751	0.380982	1.29258	0.00753316	GO:0006950(BP:response to stress)	-
TRINITY_DN141919_c1_g7	histone H1-like [Phalaenopsis equestris]	0.929521	0.0647171	1.28646	0.00121089	GO:0043229(CC:intracellular organelle)	-
TRINITY_DN136082_c0_g3	PREDICTED: early nodulin-like protein 2 [Nelumbo nucifera]	0.999377	0.992279	1.28306	0.011013	-	-
TRINITY_DN135724_c0_g3	Peptidase C1A [Macleaya cordata]	1.13796	0.0982103	1.27984	0.0253061	GO:0008233(MF:peptidase activity)	ko04142(Lysosome);ko04210(Apoptosis)
TRINITY_DN134866_c0_g1	hypothetical protein AQUCO_00300424v1 [Aquilegia coerulea]	0.914584	0.0115776	1.27384	0.00440005	-	ko04210(Apoptosis);ko04140(Autophagy - animal);ko04924(Renin secretion);ko04621(NOD-like receptor signaling pathway);ko04612(Antigen processing and presentation);ko04142(Lysosome)
TRINITY_DN139591_c4_g3	PREDICTED: protein trichome birefringence-like 38 [Nelumbo nucifera]	0.875844	0.166958	1.2698	0.0394093	-	-
TRINITY_DN139599_c2_g1	Biotin/lipoyl attachment [Macleaya cordata]	0.988165	0.826367	1.26787	0.0456324	-	ko00310(Lysine degradation);ko00020(Citrate cycle (TCA cycle))
TRINITY_DN142459_c1_g5	hypothetical protein AQUCO_00900046v1 [Aquilegia coerulea]	0.98524	0.873336	1.26758	0.0266163	GO:0046373(BP:L-arabinose metabolic process);GO:0046556(MF:alpha-L-arabinofuranosidase activity)	ko00520(Amino sugar and nucleotide sugar metabolism)
TRINITY_DN135816_c0_g3	Ran binding domain [Macleaya cordata]	1.02042	0.722975	1.2666	0.0280857	GO:0046907(BP:intracellular transport);GO:0005634(CC:nucleus);GO:0005515(MF:protein binding)	ko05166(Human T-cell leukemia virus 1 infection)
TRINITY_DN136194_c2_g2	PREDICTED: cinnamoyl-CoA reductase 2 [Nelumbo nucifera]	0.975978	0.782587	1.26585	0.0396077	GO:0005886(CC:plasma membrane);GO:0050662(MF:coenzyme binding);GO:0003824(MF:catalytic activity)	-
TRINITY_DN142484_c1_g3	hypothetical protein BVC80_8987g18 [Macleaya cordata]	1.10094	0.408817	1.26502	0.0351354	-	-
TRINITY_DN138818_c1_g2	Peptidase T1A [Macleaya cordata]	0.957685	0.319091	1.26425	0.0140558	GO:0010363(BP:regulation of plant-type hypersensitive response);GO:0051603(BP:proteolysis involved in cellular protein catabolic process);GO:0005829(CC:cytosol);GO:0005774(CC:vacuolar membrane);GO:0005839(CC:proteasome core complex);GO:0005634(CC:nucleus);GO:0004298(MF:threonine-type endopeptidase activity)	ko03050(Proteasome)
TRINITY_DN136901_c1_g2	DNA/RNA-binding protein Alba-like [Macleaya cordata];gi|1201304199|gb|OVA05846.1| DNA/RNA-binding protein Alba-like [Macleaya cordata]	0.881134	0.139544	1.2612	0.0328793	GO:0003676(MF:nucleic acid binding)	-
TRINITY_DN139143_c0_g2	FAD dependent oxidoreductase [Macleaya cordata]	0.985437	0.829216	1.25914	0.0423315	GO:0046653(BP:tetrahydrofolate metabolic process);GO:0055114(BP:oxidation-reduction process);GO:0008115(MF:sarcosine oxidase activity)	ko00260(Glycine, serine and threonine metabolism);ko04146(Peroxisome);ko00310(Lysine degradation)
TRINITY_DN137899_c0_g1	PREDICTED: quinone oxidoreductase-like [Nicotiana tabacum]	1.01186	0.76103	1.25896	0.0141235	-	-
TRINITY_DN142548_c0_g1	PREDICTED: uncharacterized protein LOC104589987 isoform X2 [Nelumbo nucifera]	1.10174	0.518872	1.25373	0.0455134	GO:0006508(BP:proteolysis);GO:0016020(CC:membrane);GO:0008236(MF:serine-type peptidase activity)	-
TRINITY_DN140354_c0_g3	Ubiquinol cytochrome reductase [Macleaya cordata]	0.957374	0.401781	1.25081	0.000834756	GO:0016020(CC:membrane);GO:0005488(MF:binding);GO:0016491(MF:oxidoreductase activity)	ko00190(Oxidative phosphorylation);ko04714(Thermogenesis);ko05012(Parkinson disease);ko05016(Huntington disease);ko04932(Non-alcoholic fatty liver disease (NAFLD));ko05010(Alzheimer disease);ko02020(Two-component system);ko04260(Cardiac muscle contraction)
TRINITY_DN139432_c0_g1	unknown [Lotus japonicus]	0.979528	0.775125	1.24802	0.0485304	GO:0005975(BP:carbohydrate metabolic process);GO:0030170(MF:pyridoxal phosphate binding);GO:0008184(MF:glycogen phosphorylase activity)	-
TRINITY_DN175188_c0_g1	Protein of unknown function DUF538 [Macleaya cordata]	1.219	0.0758061	1.24622	0.0414709	-	-
TRINITY_DN133617_c0_g1	probable NAD(P)H dehydrogenase (quinone) FQR1-like 1 [Carica papaya]	0.987578	0.857343	1.24314	0.0212714	GO:0055114(BP:oxidation-reduction process);GO:0045892(BP:negative regulation of transcription, DNA-templated);GO:0016491(MF:oxidoreductase activity);GO:0010181(MF:FMN binding)	ko00130(Ubiquinone and other terpenoid-quinone biosynthesis)
TRINITY_DN135603_c0_g4	Pyridine nucleotide-disulfide oxidoreductase [Macleaya cordata]	1.03167	0.728638	1.24117	0.0474029	GO:0009987(BP:cellular process);GO:0008152(BP:metabolic process);GO:0005623(CC:cell);GO:0050662(MF:coenzyme binding);GO:0016668(MF:oxidoreductase activity, acting on a sulfur group of donors, NAD(P) as acceptor);GO:0000166(MF:nucleotide binding)	ko00480(Glutathione metabolism);ko04918(Thyroid hormone synthesis)
TRINITY_DN136262_c6_g6	PREDICTED: serine carboxypeptidase-like 51 [Nicotiana tabacum]	0.872566	0.00582796	1.24018	0.0108814	-	-
TRINITY_DN142411_c1_g1	CrRLK1L-like protein, partial [Platanus x hispanica]	0.971566	0.698393	1.23653	0.0394144	GO:0016020(CC:membrane);GO:0004672(MF:protein kinase activity)	-
TRINITY_DN139599_c2_g4	Biotin/lipoyl attachment [Macleaya cordata]	0.986745	0.817824	1.23408	0.00240051	GO:0016740(MF:transferase activity)	ko00310(Lysine degradation);ko00020(Citrate cycle (TCA cycle))
TRINITY_DN138910_c3_g1	lipid transfer protein 3 [Artemisia annua]	1.0087	0.867185	1.23376	0.0459397	GO:0006869(BP:lipid transport);GO:0008289(MF:lipid binding)	-
TRINITY_DN137986_c3_g4	Protein of unknown function DUF642 [Macleaya cordata]	1.00543	0.921648	1.23257	0.0492799	-	-
TRINITY_DN142758_c2_g2	PREDICTED: aspartyl protease family protein At5g10770-like [Nelumbo nucifera]	1.01931	0.842714	1.23054	0.00116077	GO:0008233(MF:peptidase activity)	-
TRINITY_DN141458_c0_g1	hypothetical protein AQUCO_00200869v1 [Aquilegia coerulea];gi|1273181424|gb|PIA63132.1| hypothetical protein AQUCO_00200869v1 [Aquilegia coerulea];gi|1273181425|gb|PIA63133.1| hypothetical protein AQUCO_00200869v1 [Aquilegia coerulea];gi|1273181426|gb|PIA63134.1| hypothetical protein AQUCO_00200869v1 [Aquilegia coerulea];gi|1273181427|gb|PIA63135.1| hypothetical protein AQUCO_00200869v1 [Aquilegi…	1.00853	0.75543	1.23005	0.030432	-	-
TRINITY_DN142289_c0_g1	Citrate synthase-like [Macleaya cordata]	1.02796	0.593468	1.22725	0.0343975	GO:0006099(BP:tricarboxylic acid cycle);GO:0046912(MF:transferase activity, transferring acyl groups, acyl groups converted into alkyl on transfer)	ko00630(Glyoxylate and dicarboxylate metabolism);ko00020(Citrate cycle (TCA cycle))
TRINITY_DN134485_c0_g2	PREDICTED: peptidyl-prolyl cis-trans isomerase FKBP20-1 isoform X1 [Nelumbo nucifera];gi|720003087|ref|XP_010256877.1| PREDICTED: peptidyl-prolyl cis-trans isomerase FKBP20-1 isoform X1 [Nelumbo nucifera]	0.955519	0.525242	1.22623	0.0402539	GO:0000413(BP:protein peptidyl-prolyl isomerization);GO:0061077(BP:chaperone-mediated protein folding);GO:0005789(CC:endoplasmic reticulum membrane);GO:0005528(MF:FK506 binding);GO:0003755(MF:peptidyl-prolyl cis-trans isomerase activity)	-
TRINITY_DN139183_c1_g15	hypothetical protein AQUCO_07700012v1 [Aquilegia coerulea]	1.00543	0.947673	1.22411	0.0380941	-	-
TRINITY_DN138168_c0_g4	FAD binding domain [Macleaya cordata]	1.01415	0.718278	1.22321	0.0188929	GO:0006099(BP:tricarboxylic acid cycle);GO:0022900(BP:electron transport chain);GO:0005743(CC:mitochondrial inner membrane);GO:0050660(MF:flavin adenine dinucleotide binding);GO:0008177(MF:succinate dehydrogenase (ubiquinone) activity)	ko05010(Alzheimer disease);ko04714(Thermogenesis);ko00020(Citrate cycle (TCA cycle));ko05012(Parkinson disease);ko05016(Huntington disease);ko00190(Oxidative phosphorylation);ko04932(Non-alcoholic fatty liver disease (NAFLD))
TRINITY_DN142996_c1_g2	D-galactoside/L-rhamnose binding SUEL lectin domain [Macleaya cordata]	0.992661	0.826479	1.22142	0.0483093	GO:0044464(CC:cell part);GO:0016798(MF:hydrolase activity, acting on glycosyl bonds)	-
TRINITY_DN143107_c1_g1	hypothetical protein AQUCO_01400337v1 [Aquilegia coerulea]	0.904037	0.438253	1.21829	0.0331071	-	-
TRINITY_DN142215_c0_g4	Beta-lactamase-like [Macleaya cordata]	0.929645	0.0952684	1.21719	0.048229	GO:0016021(CC:integral component of membrane);GO:0016787(MF:hydrolase activity)	ko04310(Wnt signaling pathway)
TRINITY_DN137067_c2_g3	hypothetical protein AQUCO_02400044v1 [Aquilegia coerulea]	0.900808	0.0627264	1.21575	0.0112938	-	ko00010(Glycolysis / Gluconeogenesis);ko00620(Pyruvate metabolism);ko00630(Glyoxylate and dicarboxylate metabolism);ko00680(Methane metabolism);ko00640(Propanoate metabolism);ko00720(Carbon fixation pathways in prokaryotes)
TRINITY_DN135245_c3_g10	Multicopper oxidase [Macleaya cordata]	0.989126	0.816409	1.20978	0.0113099	GO:0055114(BP:oxidation-reduction process);GO:0016491(MF:oxidoreductase activity);GO:0005507(MF:copper ion binding)	-
TRINITY_DN138676_c0_g1	Glycerophosphoryl diester phosphodiesterase [Macleaya cordata]	0.955588	0.429588	1.20819	0.0142961	GO:0008081(MF:phosphoric diester hydrolase activity)	-
TRINITY_DN137346_c0_g8	hypothetical protein AQUCO_00700683v1 [Aquilegia coerulea]	0.932967	0.340115	1.20706	0.0247202	GO:0005618(CC:cell wall);GO:0004252(MF:serine-type endopeptidase activity)	-
TRINITY_DN136967_c1_g2	hypothetical protein AQUCO_00600023v1 [Aquilegia coerulea]	1.00276	0.944548	1.20686	0.0227121	-	-
TRINITY_DN142521_c0_g3	cytochrome P450 [Coptis japonica var. dissecta]	0.850746	0.0837737	1.20654	0.0479232	GO:0016020(CC:membrane);GO:0046872(MF:metal ion binding);GO:0016491(MF:oxidoreductase activity)	-
TRINITY_DN136683_c1_g3	Glycoside hydrolase [Macleaya cordata]	1.00811	0.906625	1.20614	0.0438435	GO:0005975(BP:carbohydrate metabolic process);GO:0004553(MF:hydrolase activity, hydrolyzing O-glycosyl compounds)	-
TRINITY_DN139278_c0_g2	Drug/metabolite transporter [Macleaya cordata]	0.982005	0.821035	1.20477	0.011042	GO:0034219(BP:carbohydrate transmembrane transport);GO:0015748(BP:organophosphate ester transport);GO:0015718(BP:monocarboxylic acid transport);GO:0009536(CC:plastid);GO:0005215(MF:transporter activity)	-
TRINITY_DN139900_c0_g2	Peroxidase 4 [Capsicum baccatum]	1.00989	0.888068	1.20436	0.0257952	GO:0098869(BP:cellular oxidant detoxification);GO:0006979(BP:response to oxidative stress);GO:0042744(BP:hydrogen peroxide catabolic process);GO:0055114(BP:oxidation-reduction process);GO:0005576(CC:extracellular region);GO:0046872(MF:metal ion binding);GO:0020037(MF:heme binding);GO:0004601(MF:peroxidase activity)	-
TRINITY_DN138932_c1_g4	PREDICTED: probable acyl-activating enzyme 5, peroxisomal [Nelumbo nucifera]	1.11059	0.0644091	1.20313	0.0322605	GO:0008152(BP:metabolic process);GO:0003824(MF:catalytic activity)	-
TRINITY_DN143170_c6_g2	PREDICTED: universal stress protein A-like protein isoform X1 [Elaeis guineensis]	1.01667	0.688756	0.832447	0.00091458	-	-
TRINITY_DN141529_c3_g5	actin, partial [Corchorus capsularis]	1.09078	0.12701	0.832126	0.00916391	GO:0005524(MF:ATP binding)	-
TRINITY_DN140700_c0_g3	PREDICTED: endoplasmin homolog [Nelumbo nucifera]	1.15897	0.00790319	0.828196	0.00560973	GO:0006457(BP:protein folding);GO:0006950(BP:response to stress);GO:0005524(MF:ATP binding);GO:0051082(MF:unfolded protein binding)	ko04151(PI3K-Akt signaling pathway);ko04141(Protein processing in endoplasmic reticulum);ko05200(Pathways in cancer);ko05215(Prostate cancer);ko04626(Plant-pathogen interaction);ko04657(IL-17 signaling pathway);ko04915(Estrogen signaling pathway);ko05418(Fluid shear stress and atherosclerosis);ko04918(Thyroid hormone synthesis)
TRINITY_DN110932_c0_g1	Ribosomal protein S1 [Macleaya cordata]	0.998465	0.953121	0.827281	0.0402678	GO:0006413(BP:translational initiation);GO:0005851(CC:eukaryotic translation initiation factor 2B complex);GO:0005840(CC:ribosome);GO:0033290(CC:eukaryotic 48S preinitiation complex);GO:0043614(CC:multi-eIF complex);GO:0005850(CC:eukaryotic translation initiation factor 2 complex);GO:0003743(MF:translation initiation factor activity);GO:0043022(MF:ribosome binding)	ko04932(Non-alcoholic fatty liver disease (NAFLD));ko05160(Hepatitis C);ko04141(Protein processing in endoplasmic reticulum);ko04140(Autophagy - animal);ko04138(Autophagy - yeast);ko05164(Influenza A);ko05162(Measles);ko03013(RNA transport);ko05168(Herpes simplex infection);ko04210(Apoptosis)
TRINITY_DN138602_c1_g7	Ribosomal protein [Parasponia andersonii];gi|1338472971|gb|PON94926.1| Ribosomal protein [Trema orientalis]	0.91541	0.108161	0.823592	0.039911	GO:0006412(BP:translation);GO:0005840(CC:ribosome);GO:0003735(MF:structural constituent of ribosome);GO:0000166(MF:nucleotide binding)	ko03010(Ribosome)
TRINITY_DN141689_c2_g1	26S proteasome regulatory subunit S10B homolog B-like [Olea europaea var. sylvestris]	0.932004	0.142946	0.82302	0.0320584	GO:0030163(BP:protein catabolic process);GO:0005737(CC:cytoplasm);GO:0016787(MF:hydrolase activity);GO:0005524(MF:ATP binding)	ko05169(Epstein-Barr virus infection);ko03050(Proteasome)
TRINITY_DN141212_c2_g2	Nonaspanin (TM9SF) [Macleaya cordata]	1.0178	0.801466	0.822058	0.0410953	GO:0016021(CC:integral component of membrane)	-
TRINITY_DN137396_c0_g1	PREDICTED: ras-related protein RABA1f [Tarenaya hassleriana]	1.04113	0.277898	0.82131	0.00267376	GO:0007264(BP:small GTPase mediated signal transduction);GO:0005622(CC:intracellular);GO:0005525(MF:GTP binding)	ko04972(Pancreatic secretion);ko04961(Endocrine and other factor-regulated calcium reabsorption);ko04962(Vasopressin-regulated water reabsorption);ko04144(Endocytosis)
TRINITY_DN137996_c1_g5	thioredoxin H2 [Prunus avium]	0.971841	0.00995227	0.821112	0.0027264	-	ko05418(Fluid shear stress and atherosclerosis);ko04621(NOD-like receptor signaling pathway)
TRINITY_DN142556_c2_g1	PREDICTED: coatomer subunit beta&apos;-2 isoform X1 [Nelumbo nucifera];gi|719980490|ref|XP_010249815.1| PREDICTED: coatomer subunit beta&apos;-2 isoform X1 [Nelumbo nucifera];gi|719980493|ref|XP_010249816.1| PREDICTED: coatomer subunit beta&apos;-2 isoform X1 [Nelumbo nucifera]	1.11161	0.0563335	0.821057	0.0102116	GO:0006810(BP:transport)	-
TRINITY_DN134801_c1_g2	hypothetical protein AQUCO_01700497v1 [Aquilegia coerulea];gi|1273163236|gb|PIA44959.1| hypothetical protein AQUCO_01700497v1 [Aquilegia coerulea]	1.07121	0.409947	0.821013	0.0432432	GO:0006888(BP:ER to Golgi vesicle-mediated transport);GO:0005737(CC:cytoplasm)	-
TRINITY_DN138542_c2_g3	Translation initiation factor IF2/IF5 [Macleaya cordata]	1.04593	0.694765	0.820413	0.0298586	GO:0006413(BP:translational initiation);GO:0003743(MF:translation initiation factor activity)	ko03013(RNA transport)
TRINITY_DN142869_c5_g4	PREDICTED: UDP-glycosyltransferase 74F2-like [Nelumbo nucifera]	1.08262	0.21512	0.82006	0.019213	-	-
TRINITY_DN142223_c1_g13	unnamed protein product, partial [Vitis vinifera]	1.10783	0.0422734	0.819442	0.0199872	GO:0097159(MF:organic cyclic compound binding);GO:1901363(MF:heterocyclic compound binding)	ko03040(Spliceosome)
TRINITY_DN143253_c3_g5	Heat shock protein Hsp90 family [Parasponia andersonii];gi|1338475853|gb|PON97790.1| Heat shock protein Hsp90 family [Trema orientalis]	0.919942	0.111108	0.819435	0.0127816	GO:0006457(BP:protein folding);GO:0006950(BP:response to stress);GO:0005524(MF:ATP binding);GO:0051082(MF:unfolded protein binding)	-
TRINITY_DN138804_c1_g2	Exocyst complex [Macleaya cordata]	1.08395	0.391259	0.819014	0.0400753	-	-
TRINITY_DN137869_c1_g6	THL2 [Corylus heterophylla x Corylus avellana]	0.888908	0.098784	0.816841	0.0469825	GO:0045454(BP:cell redox homeostasis);GO:0006662(BP:glycerol ether metabolic process);GO:0043085(BP:positive regulation of catalytic activity);GO:0055114(BP:oxidation-reduction process);GO:0005623(CC:cell);GO:0048046(CC:apoplast);GO:0008047(MF:enzyme activator activity);GO:0016671(MF:oxidoreductase activity, acting on a sulfur group of donors, disulfide as acceptor);GO:0015035(MF:protein disulfid…	ko05418(Fluid shear stress and atherosclerosis);ko04621(NOD-like receptor signaling pathway)
TRINITY_DN143167_c0_g2	hypothetical protein AQUCO_00400598v1 [Aquilegia coerulea];gi|1273178108|gb|PIA59818.1| hypothetical protein AQUCO_00400598v1 [Aquilegia coerulea];gi|1273178110|gb|PIA59820.1| hypothetical protein AQUCO_00400598v1 [Aquilegia coerulea];gi|1273178111|gb|PIA59821.1| hypothetical protein AQUCO_00400598v1 [Aquilegia coerulea]	0.991143	0.893906	0.816289	0.00855991	GO:0009086(BP:methionine biosynthetic process);GO:0032259(BP:methylation);GO:0008270(MF:zinc ion binding);GO:0003871(MF:5-methyltetrahydropteroyltriglutamate-homocysteine S-methyltransferase activity)	-
TRINITY_DN140112_c0_g3	tubulin-folding cofactor A-like [Quercus suber];gi|1344048115|ref|XP_023904154.1| tubulin-folding cofactor A-like [Quercus suber];gi|1344048117|ref|XP_023904155.1| tubulin-folding cofactor A-like [Quercus suber];gi|1344048119|ref|XP_023904157.1| tubulin-folding cofactor A-like [Quercus suber];gi|1344048121|ref|XP_023904158.1| tubulin-folding cofactor A-like [Quercus suber];gi|1336302637|gb|POE456…	1.02435	0.784906	0.814754	0.0284896	GO:0009987(BP:cellular process)	-
TRINITY_DN139003_c0_g2	hypothetical protein BVC80_1707g104 [Macleaya cordata]	1.06568	0.112459	0.812739	0.00342845	GO:0016787(MF:hydrolase activity)	-
TRINITY_DN143329_c1_g1	Clathrin/coatomer adaptor [Macleaya cordata]	1.04944	0.350511	0.811781	0.00987924	GO:0016192(BP:vesicle-mediated transport);GO:0006886(BP:intracellular protein transport);GO:0000139(CC:Golgi membrane);GO:0030126(CC:COPI vesicle coat);GO:0005198(MF:structural molecule activity)	-
TRINITY_DN134702_c1_g2	unnamed protein product, partial [Vitis vinifera]	0.927615	0.224845	0.810747	0.0220507	GO:0042254(BP:ribosome biogenesis);GO:0006412(BP:translation);GO:0015935(CC:small ribosomal subunit);GO:0005829(CC:cytosol);GO:0003735(MF:structural constituent of ribosome);GO:0003723(MF:RNA binding)	ko03010(Ribosome)
TRINITY_DN137146_c0_g1	PREDICTED: dihydrolipoyl dehydrogenase 2, chloroplastic isoform X2 [Nelumbo nucifera]	1.17402	0.0100331	0.809223	0.00325611	GO:0045454(BP:cell redox homeostasis);GO:0055114(BP:oxidation-reduction process);GO:0005623(CC:cell);GO:0050660(MF:flavin adenine dinucleotide binding);GO:0016668(MF:oxidoreductase activity, acting on a sulfur group of donors, NAD(P) as acceptor)	ko00010(Glycolysis / Gluconeogenesis);ko00630(Glyoxylate and dicarboxylate metabolism);ko00620(Pyruvate metabolism);ko00260(Glycine, serine and threonine metabolism);ko00280(Valine, leucine and isoleucine degradation);ko00020(Citrate cycle (TCA cycle));ko00640(Propanoate metabolism)
TRINITY_DN142375_c1_g6	Alcohol dehydrogenase superfamily [Macleaya cordata]	0.957064	0.456196	0.807041	0.0326877	GO:0055114(BP:oxidation-reduction process);GO:0008270(MF:zinc ion binding);GO:0016491(MF:oxidoreductase activity)	-
TRINITY_DN135189_c0_g5	PREDICTED: nucleoid-associated protein At2g24020, chloroplastic-like [Nelumbo nucifera]	0.923745	0.330094	0.801846	0.0484326	-	-
TRINITY_DN140847_c0_g2	hypothetical protein AQUCO_04100015v1 [Aquilegia coerulea];gi|1273151552|gb|PIA33299.1| hypothetical protein AQUCO_04100015v1 [Aquilegia coerulea];gi|1273151553|gb|PIA33300.1| hypothetical protein AQUCO_04100015v1 [Aquilegia coerulea]	1.17507	0.253062	0.800099	0.0165372	GO:0009298(BP:GDP-mannose biosynthetic process);GO:0005975(BP:carbohydrate metabolic process);GO:0008270(MF:zinc ion binding);GO:0004476(MF:mannose-6-phosphate isomerase activity)	ko00520(Amino sugar and nucleotide sugar metabolism);ko00051(Fructose and mannose metabolism)
TRINITY_DN137230_c3_g10	PREDICTED: carbamoyl-phosphate synthase large chain, chloroplastic-like [Nelumbo nucifera]	0.989908	0.773799	0.79906	0.0478512	-	ko00250(Alanine, aspartate and glutamate metabolism);ko00240(Pyrimidine metabolism)
TRINITY_DN136073_c1_g9	Ribosomal protein L7/L12 [Macleaya cordata]	0.906361	0.15687	0.797429	0.00678108	GO:0006412(BP:translation);GO:0005622(CC:intracellular);GO:0003735(MF:structural constituent of ribosome)	ko03010(Ribosome)
TRINITY_DN141368_c4_g1	hypothetical protein BVC80_633g9 [Macleaya cordata]	0.940071	0.309496	0.794555	0.0126625	-	-
TRINITY_DN139907_c3_g3	Snf7 [Macleaya cordata]	0.920763	0.20069	0.79304	0.0259221	GO:0007034(BP:vacuolar transport);GO:0005622(CC:intracellular)	ko04144(Endocytosis);ko04217(Necroptosis)
TRINITY_DN137676_c2_g5	hypothetical protein AQUCO_00201451v1 [Aquilegia coerulea]	1.23943	0.0620577	0.792134	0.0125232	GO:0051603(BP:proteolysis involved in cellular protein catabolic process);GO:0004185(MF:serine-type carboxypeptidase activity)	-
TRINITY_DN141745_c2_g4	ATPase subunit 4 (mitochondrion) [Nelumbo nucifera];gi|944203017|gb|ALL55110.1| ATPase subunit 4 (mitochondrion) [Nelumbo nucifera]	1.05237	0.0159184	0.791568	0.0115794	GO:0015986(BP:ATP synthesis coupled proton transport);GO:0016021(CC:integral component of membrane);GO:0005739(CC:mitochondrion);GO:0015078(MF:proton transmembrane transporter activity)	-
TRINITY_DN137436_c1_g5	hypothetical protein AQUCO_00600248v1 [Aquilegia coerulea];gi|1273175669|gb|PIA57381.1| hypothetical protein AQUCO_00600248v1 [Aquilegia coerulea]	1.05921	0.264866	0.791128	0.0457599	GO:0050896(BP:response to stimulus);GO:0016020(CC:membrane);GO:0004601(MF:peroxidase activity)	ko00480(Glutathione metabolism);ko00053(Ascorbate and aldarate metabolism)
TRINITY_DN141794_c0_g3	Annexin [Macleaya cordata]	1.07162	0.134029	0.789732	0.0163679	GO:0043167(MF:ion binding)	-
TRINITY_DN137766_c1_g1	Chaperonin Cpn60/TCP-1 [Macleaya cordata]	1.03797	0.335235	0.788675	0.00275118	-	-
TRINITY_DN134543_c1_g3	PREDICTED: phenylalanine--tRNA ligase alpha subunit, cytoplasmic [Nelumbo nucifera]	1.02338	0.690151	0.787796	0.0151333	GO:0006432(BP:phenylalanyl-tRNA aminoacylation);GO:0009328(CC:phenylalanine-tRNA ligase complex);GO:0004826(MF:phenylalanine-tRNA ligase activity);GO:0000166(MF:nucleotide binding)	ko00970(Aminoacyl-tRNA biosynthesis)
TRINITY_DN138422_c0_g3	Aminoglycoside phosphotransferase [Macleaya cordata]	1.09918	0.588543	0.787323	0.0225776	GO:0055114(BP:oxidation-reduction process);GO:0050660(MF:flavin adenine dinucleotide binding);GO:0003995(MF:acyl-CoA dehydrogenase activity)	ko03320(PPAR signaling pathway);ko00640(Propanoate metabolism);ko00071(Fatty acid degradation);ko00280(Valine, leucine and isoleucine degradation);ko00410(beta-Alanine metabolism)
TRINITY_DN137646_c3_g7	PREDICTED: ATP synthase subunit d, mitochondrial-like [Nelumbo nucifera]	1.04461	0.217221	0.784058	0.0159152	GO:0015986(BP:ATP synthesis coupled proton transport);GO:0000276(CC:mitochondrial proton-transporting ATP synthase complex, coupling factor F(o));GO:0015078(MF:proton transmembrane transporter activity)	ko05010(Alzheimer disease);ko04714(Thermogenesis);ko05012(Parkinson disease);ko05016(Huntington disease);ko00190(Oxidative phosphorylation)
TRINITY_DN142699_c1_g1	hypothetical protein GLYMA_04G231800 [Glycine max]	0.962169	0.42469	0.783673	0.00736734	GO:0055114(BP:oxidation-reduction process);GO:0016021(CC:integral component of membrane);GO:0020037(MF:heme binding);GO:0046872(MF:metal ion binding);GO:0004128(MF:cytochrome-b5 reductase activity, acting on NAD(P)H)	-
TRINITY_DN143253_c3_g7	heat shock protein 83, partial [Beta vulgaris]	1.02103	0.631921	0.782682	0.00771588	GO:0006457(BP:protein folding);GO:0006950(BP:response to stress);GO:0005524(MF:ATP binding);GO:0051082(MF:unfolded protein binding)	-
TRINITY_DN143223_c1_g1	PREDICTED: 14-3-3-like protein D isoform X2 [Nelumbo nucifera]	0.987972	0.886864	0.778516	0.0157161	GO:0019904(MF:protein domain specific binding)	ko04114(Oocyte meiosis);ko04151(PI3K-Akt signaling pathway);ko04390(Hippo signaling pathway);ko04011(MAPK signaling pathway - yeast);ko04110(Cell cycle);ko04391(Hippo signaling pathway - fly);ko04722(Neurotrophin signaling pathway);ko05203(Viral carcinogenesis)
TRINITY_DN141779_c0_g2	NSF attachment protein [Macleaya cordata]	1.05049	0.484698	0.778426	0.0428618	GO:0006886(BP:intracellular protein transport);GO:0005622(CC:intracellular)	ko04138(Autophagy - yeast);ko04721(Synaptic vesicle cycle)
TRINITY_DN136634_c1_g1	Acyl transferase [Macleaya cordata]	1.08381	0.0267385	0.778374	0.000516254	GO:0008152(BP:metabolic process);GO:0004314(MF:[acyl-carrier-protein] S-malonyltransferase activity)	ko00333(Prodigiosin biosynthesis);ko00061(Fatty acid biosynthesis)
TRINITY_DN137457_c3_g4	hypothetical protein AQUCO_02600324v1 [Aquilegia coerulea]	1.01791	0.855663	0.778147	0.032831	GO:0016020(CC:membrane)	-
TRINITY_DN137486_c2_g13	60s ribosomal protein l17-2 [Quercus suber]	1.03462	0.564361	0.775607	0.0201211	GO:0006412(BP:translation);GO:0015934(CC:large ribosomal subunit);GO:0003735(MF:structural constituent of ribosome)	-
TRINITY_DN134142_c0_g3	Major intrinsic protein [Macleaya cordata]	1.06202	0.557711	0.774479	0.0225187	GO:0016020(CC:membrane)	-
TRINITY_DN135804_c2_g4	hypothetical protein BVC80_8695g5 [Macleaya cordata]	0.960142	0.232258	0.770292	0.0434552	-	-
TRINITY_DN137441_c3_g3	PREDICTED: ras-related protein RABA2a [Theobroma cacao];gi|508705109|gb|EOX97005.1| RAB GTPase 11C [Theobroma cacao]	0.947337	0.530455	0.76811	0.0116994	GO:0000911(BP:cytokinesis by cell plate formation);GO:0007264(BP:small GTPase mediated signal transduction);GO:0005768(CC:endosome);GO:0009504(CC:cell plate);GO:0005886(CC:plasma membrane);GO:0005829(CC:cytosol);GO:0005525(MF:GTP binding)	ko04972(Pancreatic secretion);ko04961(Endocrine and other factor-regulated calcium reabsorption);ko04962(Vasopressin-regulated water reabsorption);ko04144(Endocytosis)
TRINITY_DN141827_c0_g2	Chaperonin Cpn60/TCP-1 [Macleaya cordata]	0.951684	0.322605	0.767851	0.0203646	GO:0006457(BP:protein folding);GO:0005737(CC:cytoplasm);GO:0005524(MF:ATP binding);GO:0051082(MF:unfolded protein binding)	-
TRINITY_DN137684_c0_g6	hypothetical protein B456_002G025700, partial [Gossypium raimondii]	0.824628	0.065863	0.767838	0.0135833	GO:0042273(BP:ribosomal large subunit biogenesis);GO:0006412(BP:translation);GO:0022625(CC:cytosolic large ribosomal subunit);GO:0003735(MF:structural constituent of ribosome)	ko03010(Ribosome)
TRINITY_DN138467_c0_g2	hypothetical protein AQUCO_00300506v1 [Aquilegia coerulea]	1.08064	0.0211501	0.767183	0.0164436	GO:0016020(CC:membrane)	-
TRINITY_DN143377_c2_g1	Clathrin [Macleaya cordata]	1.05878	0.308607	0.767096	0.0303416	GO:0016192(BP:vesicle-mediated transport);GO:0006886(BP:intracellular protein transport);GO:0030132(CC:clathrin coat of coated pit);GO:0030130(CC:clathrin coat of trans-Golgi network vesicle);GO:0005198(MF:structural molecule activity)	ko04144(Endocytosis);ko05100(Bacterial invasion of epithelial cells);ko04721(Synaptic vesicle cycle);ko04961(Endocrine and other factor-regulated calcium reabsorption);ko04142(Lysosome);ko05016(Huntington disease)
TRINITY_DN138197_c1_g8	SecY protein, partial [Arachis diogoi]	1.07442	0.509526	0.765761	0.0463178	GO:0015031(BP:protein transport);GO:0016021(CC:integral component of membrane)	-
TRINITY_DN138004_c1_g1	PREDICTED: probable ATP synthase 24 kDa subunit, mitochondrial [Vitis vinifera];gi|296082520|emb|CBI21525.3| unnamed protein product, partial [Vitis vinifera]	1.02186	0.653094	0.760594	0.00253265	GO:0009555(BP:pollen development);GO:0005730(CC:nucleolus);GO:0009507(CC:chloroplast);GO:0005753(CC:mitochondrial proton-transporting ATP synthase complex);GO:0050897(MF:cobalt ion binding);GO:0005507(MF:copper ion binding);GO:0008270(MF:zinc ion binding)	-
TRINITY_DN142543_c1_g3	Ribosomal protein S17e [Macleaya cordata]	0.934179	0.0153502	0.760231	0.0129033	GO:0005622(CC:intracellular)	ko03010(Ribosome)
TRINITY_DN141766_c1_g1	hypothetical protein AQUCO_00201247v1 [Aquilegia coerulea]	1.02636	0.709696	0.759481	0.0204756	GO:0016021(CC:integral component of membrane)	-
TRINITY_DN136741_c3_g3	Small GTPase superfamily [Macleaya cordata]	0.968531	0.246582	0.759346	0.00450731	GO:0007264(BP:small GTPase mediated signal transduction);GO:0006888(BP:ER to Golgi vesicle-mediated transport);GO:0032588(CC:trans-Golgi network membrane);GO:0005886(CC:plasma membrane);GO:0080115(MF:myosin XI tail binding);GO:0030742(MF:GTP-dependent protein binding);GO:0016787(MF:hydrolase activity);GO:0005525(MF:GTP binding)	-
TRINITY_DN140308_c0_g6	Histidine phosphatase superfamily [Macleaya cordata]	1.15775	0.0640518	0.758564	0.0214653	-	-
TRINITY_DN139642_c0_g1	PREDICTED: beta-adaptin-like protein B [Nelumbo nucifera]	1.11092	0.248712	0.756597	0.0253561	GO:0016192(BP:vesicle-mediated transport);GO:0006886(BP:intracellular protein transport);GO:0030131(CC:clathrin adaptor complex);GO:0008565(MF:protein transporter activity)	ko04142(Lysosome);ko05170(Human immunodeficiency virus 1 infection)
TRINITY_DN129408_c1_g4	vesicle-associated membrane protein 7-like [Quercus suber]	1.01929	0.849362	0.756554	0.00356755	-	-
TRINITY_DN138095_c0_g4	Protein EXPORTIN 1A [Zea mays]	1.01185	0.90202	0.753318	0.00429288	GO:0006886(BP:intracellular protein transport);GO:0016021(CC:integral component of membrane);GO:0005622(CC:intracellular);GO:0008536(MF:Ran GTPase binding)	-
TRINITY_DN137008_c1_g9	PREDICTED: ATP-dependent Clp protease proteolytic subunit 4, chloroplastic-like [Nelumbo nucifera]	0.988208	0.600049	0.7515	0.00333067	GO:0006508(BP:proteolysis);GO:0004252(MF:serine-type endopeptidase activity)	ko04212(Longevity regulating pathway - worm);ko04112(Cell cycle - Caulobacter)
TRINITY_DN136858_c0_g1	PREDICTED: 26S proteasome non-ATPase regulatory subunit 11 homolog isoform X1 [Nelumbo nucifera]	0.997012	0.949504	0.751018	0.00507537	GO:0000502(CC:proteasome complex)	ko03050(Proteasome);ko05169(Epstein-Barr virus infection)
TRINITY_DN138915_c0_g1	PREDICTED: protein transport protein Sec61 subunit alpha [Eucalyptus grandis];gi|629102097|gb|KCW67566.1| hypothetical protein EUGRSUZ_F01316 [Eucalyptus grandis]	0.991196	0.836304	0.749218	0.000642299	GO:0015031(BP:protein transport);GO:0016021(CC:integral component of membrane)	-
TRINITY_DN140652_c4_g1	GNAT domain [Macleaya cordata]	1.08385	0.158031	0.748538	0.00194437	GO:0008080(MF:N-acetyltransferase activity)	-
TRINITY_DN138415_c1_g10	Proteasome component (PCI) domain [Macleaya cordata]	1.02248	0.623138	0.748406	0.0100762	-	ko05169(Epstein-Barr virus infection);ko03050(Proteasome)
TRINITY_DN135584_c0_g4	hypothetical protein AQUCO_00500105v1 [Aquilegia coerulea]	0.870335	0.187659	0.744696	0.0111109	GO:0016020(CC:membrane)	-
TRINITY_DN138959_c1_g10	Tetratricopeptide repeat-containing domain [Macleaya cordata]	0.974097	0.662578	0.743989	0.0405719	-	-
TRINITY_DN137764_c1_g1	14-3-3 protein [Macleaya cordata]	0.924979	0.159238	0.742806	0.00230543	GO:0019904(MF:protein domain specific binding)	ko04114(Oocyte meiosis);ko04151(PI3K-Akt signaling pathway);ko04390(Hippo signaling pathway);ko04011(MAPK signaling pathway - yeast);ko04110(Cell cycle);ko04391(Hippo signaling pathway - fly);ko04722(Neurotrophin signaling pathway);ko05203(Viral carcinogenesis)
TRINITY_DN142069_c3_g6	PREDICTED: adenine phosphoribosyltransferase 1, chloroplastic isoform X1 [Vitis vinifera];gi|302142210|emb|CBI19413.3| unnamed protein product, partial [Vitis vinifera]	1.03542	0.162079	0.740621	0.0119716	GO:0009116(BP:nucleoside metabolic process);GO:0006168(BP:adenine salvage);GO:0005737(CC:cytoplasm);GO:0003999(MF:adenine phosphoribosyltransferase activity)	ko00230(Purine metabolism)
TRINITY_DN138437_c0_g2	uncharacterized protein LOC18792375 [Prunus persica];gi|1139797161|gb|ONI29779.1| hypothetical protein PRUPE_1G214200 [Prunus persica];gi|1139797162|gb|ONI29780.1| hypothetical protein PRUPE_1G214200 [Prunus persica]	1.00361	0.953885	0.73771	0.0130618	GO:0005975(BP:carbohydrate metabolic process);GO:0006098(BP:pentose-phosphate shunt);GO:0005737(CC:cytoplasm);GO:0004801(MF:sedoheptulose-7-phosphate:D-glyceraldehyde-3-phosphate glyceronetransferase activity)	-
TRINITY_DN142382_c0_g3	Chorismate mutase [Macleaya cordata]	1.12723	0.0033991	0.730076	0.0114801	GO:0046417(BP:chorismate metabolic process);GO:0009073(BP:aromatic amino acid family biosynthetic process);GO:0004106(MF:chorismate mutase activity)	ko00400(Phenylalanine, tyrosine and tryptophan biosynthesis)
TRINITY_DN139840_c4_g3	Cytochrome c1 [Macleaya cordata]	1.05582	0.606246	0.724933	0.0331153	GO:0020037(MF:heme binding);GO:0009055(MF:electron transfer activity)	ko04714(Thermogenesis);ko05012(Parkinson disease);ko05016(Huntington disease);ko00190(Oxidative phosphorylation);ko02020(Two-component system);ko05010(Alzheimer disease);ko04260(Cardiac muscle contraction);ko04932(Non-alcoholic fatty liver disease (NAFLD))
TRINITY_DN141809_c0_g6	hypothetical protein AQUCO_00900061v1 [Aquilegia coerulea]	1.01299	0.896757	0.720201	0.0271537	GO:0009628(BP:response to abiotic stimulus);GO:0010466(BP:negative regulation of peptidase activity);GO:0006950(BP:response to stress);GO:0030414(MF:peptidase inhibitor activity)	-
TRINITY_DN141188_c0_g4	ClpA/B family [Macleaya cordata]	1.10301	0.160926	0.719182	0.00751987	GO:0016485(BP:protein processing);GO:0009408(BP:response to heat);GO:0005737(CC:cytoplasm);GO:0005524(MF:ATP binding)	ko04213(Longevity regulating pathway - multiple species)
TRINITY_DN141620_c0_g2	Drug/metabolite transporter [Macleaya cordata]	1.03374	0.80197	0.718855	0.00871829	GO:0034219(BP:carbohydrate transmembrane transport)	-
TRINITY_DN136724_c0_g2	hypothetical protein B456_009G177100 [Gossypium raimondii]	0.957546	0.693886	0.716355	0.0206161	GO:0016020(CC:membrane)	-
TRINITY_DN137396_c0_g4	PREDICTED: ras-related protein RABA1f [Vitis vinifera]	0.990286	0.702169	0.712637	0.0027375	GO:0007264(BP:small GTPase mediated signal transduction);GO:0005622(CC:intracellular);GO:0005525(MF:GTP binding)	-
TRINITY_DN138329_c2_g1	hypothetical protein CISIN_1g012629mg [Citrus sinensis]	0.931176	0.591872	0.70625	0.0379038	GO:0015689(BP:molybdate ion transport);GO:0016021(CC:integral component of membrane);GO:0015098(MF:molybdate ion transmembrane transporter activity)	-
TRINITY_DN138095_c0_g1	PREDICTED: protein EXPORTIN 1A [Nelumbo nucifera]	1.01688	0.659026	0.703951	3.6217e-06	GO:0006886(BP:intracellular protein transport);GO:0005622(CC:intracellular);GO:0008536(MF:Ran GTPase binding)	ko05164(Influenza A);ko04013(MAPK signaling pathway - fly);ko03008(Ribosome biogenesis in eukaryotes);ko03013(RNA transport);ko05166(Human T-cell leukemia virus 1 infection)
TRINITY_DN139740_c2_g4	WD40 repeat [Macleaya cordata]	1.0946	0.248118	0.703901	0.0228069	GO:0016192(BP:vesicle-mediated transport);GO:0006886(BP:intracellular protein transport);GO:0000139(CC:Golgi membrane);GO:0030126(CC:COPI vesicle coat);GO:0016740(MF:transferase activity);GO:0005198(MF:structural molecule activity)	-
TRINITY_DN136180_c3_g4	calmodulin 2 [Zea mays];gi|747917|emb|CAA54583.1| calmodulin [Zea mays];gi|238007520|gb|ACR34795.1| unknown [Zea mays]	0.864745	0.335275	0.701741	0.0151098	GO:0075177(BP:regulation of calcium or calmodulin-mediated signal transduction in response to host);GO:0005509(MF:calcium ion binding)	ko05200(Pathways in cancer);ko04750(Inflammatory mediator regulation of TRP channels);ko04720(Long-term potentiation);ko04261(Adrenergic signaling in cardiomyocytes);ko04971(Gastric acid secretion);ko04740(Olfactory transduction);ko04970(Salivary secretion);ko05418(Fluid shear stress and atherosclerosis);ko05214(Glioma);ko05010(Alzheimer disease);ko04910(Insulin signaling pathway);ko04016(MAPK si…
TRINITY_DN129903_c0_g1	PREDICTED: hsp70 nucleotide exchange factor FES1 isoform X2 [Vitis vinifera]	1.13072	0.0615639	0.701404	0.00547862	-	ko04141(Protein processing in endoplasmic reticulum)
TRINITY_DN141417_c1_g2	Isocitrate dehydrogenase NADP-dependent [Macleaya cordata]	1.0096	0.857951	0.69995	0.0136994	GO:0072350(BP:tricarboxylic acid metabolic process);GO:0055114(BP:oxidation-reduction process);GO:0044434(CC:chloroplast part);GO:0046872(MF:metal ion binding);GO:0016616(MF:oxidoreductase activity, acting on the CH-OH group of donors, NAD or NADP as acceptor)	ko00020(Citrate cycle (TCA cycle));ko00480(Glutathione metabolism);ko00720(Carbon fixation pathways in prokaryotes);ko04146(Peroxisome)
TRINITY_DN138460_c2_g9	B-cell receptor-associated 31-like [Macleaya cordata]	1.04567	0.205415	0.69759	0.00122882	GO:0016020(CC:membrane)	ko04141(Protein processing in endoplasmic reticulum);ko05165(Human papillomavirus infection)
TRINITY_DN139380_c0_g1	hypothetical protein BVC80_1583g19 [Macleaya cordata]	0.990312	0.890429	0.697535	0.0320607	-	-
TRINITY_DN137440_c4_g7	PREDICTED: 60S ribosomal protein L22-2-like [Nelumbo nucifera]	0.969907	0.653271	0.696727	0.042337	GO:0002181(BP:cytoplasmic translation);GO:0022625(CC:cytosolic large ribosomal subunit);GO:0003735(MF:structural constituent of ribosome)	ko03010(Ribosome)
TRINITY_DN138759_c0_g1	uncharacterized protein LOC110758851 [Prunus avium]	1.05607	0.148813	0.695904	0.00195449	GO:0005509(MF:calcium ion binding)	-
TRINITY_DN139104_c1_g2	PREDICTED: NADH dehydrogenase [ubiquinone] 1 beta subcomplex subunit 10-A-like [Nelumbo nucifera]	0.935243	0.226742	0.694929	0.00350925	-	ko04932(Non-alcoholic fatty liver disease (NAFLD));ko00190(Oxidative phosphorylation);ko05016(Huntington disease);ko05012(Parkinson disease);ko04723(Retrograde endocannabinoid signaling);ko04714(Thermogenesis);ko05010(Alzheimer disease)
TRINITY_DN98074_c0_g2	PREDICTED: DNA-binding protein DDB_G0278111 [Vitis vinifera]	0.976389	0.701753	0.694771	0.00314637	GO:0003677(MF:DNA binding)	-
TRINITY_DN137763_c0_g5	26S proteasome non-ATPase regulatory subunit 6 homolog [Lactuca sativa];gi|1322383845|gb|PLY78505.1| hypothetical protein LSAT_4X78821 [Lactuca sativa]	0.976853	0.786178	0.694521	0.00456003	GO:0043161(BP:proteasome-mediated ubiquitin-dependent protein catabolic process)	ko05169(Epstein-Barr virus infection);ko03050(Proteasome)
TRINITY_DN136180_c3_g1	PREDICTED: 40S ribosomal protein S9-2-like [Nelumbo nucifera];gi|720044313|ref|XP_010269850.1| PREDICTED: 40S ribosomal protein S9-2-like [Nelumbo nucifera]	0.892841	0.0385979	0.694354	0.00783818	GO:0045903(BP:positive regulation of translational fidelity);GO:0022627(CC:cytosolic small ribosomal subunit);GO:0019843(MF:rRNA binding);GO:0003735(MF:structural constituent of ribosome)	ko03010(Ribosome)
TRINITY_DN140211_c2_g8	Inositol oxygenase [Macleaya cordata]	1.14654	0.542095	0.691241	0.0450288	-	ko00053(Ascorbate and aldarate metabolism);ko00562(Inositol phosphate metabolism)
TRINITY_DN142342_c1_g9	Prefoldin beta-like [Macleaya cordata]	0.988378	0.872613	0.688252	0.0111302	GO:0006457(BP:protein folding);GO:0016272(CC:prefoldin complex);GO:0051082(MF:unfolded protein binding)	-
TRINITY_DN139093_c0_g3	PREDICTED: choline/ethanolaminephosphotransferase 1 isoform X1 [Nelumbo nucifera];gi|719967445|ref|XP_010261890.1| PREDICTED: choline/ethanolaminephosphotransferase 1 isoform X1 [Nelumbo nucifera];gi|719967448|ref|XP_010261898.1| PREDICTED: choline/ethanolaminephosphotransferase 1 isoform X1 [Nelumbo nucifera]	0.993074	0.903848	0.683185	0.00426107	GO:0016020(CC:membrane);GO:0016740(MF:transferase activity)	ko00565(Ether lipid metabolism);ko00440(Phosphonate and phosphinate metabolism);ko00564(Glycerophospholipid metabolism)
TRINITY_DN139504_c1_g6	Prefoldin beta-like [Macleaya cordata]	0.972406	0.632151	0.679653	0.0181613	GO:0006457(BP:protein folding);GO:0016272(CC:prefoldin complex);GO:0051082(MF:unfolded protein binding)	-
TRINITY_DN140862_c1_g3	Nonaspanin (TM9SF) [Macleaya cordata]	0.936366	0.522753	0.676657	0.00767601	GO:0016021(CC:integral component of membrane)	-
TRINITY_DN142356_c2_g5	Organic solute transporter Ost-alpha [Macleaya cordata]	0.844712	0.0285654	0.676531	0.0086439	GO:0016020(CC:membrane)	-
TRINITY_DN135143_c1_g1	PREDICTED: protein CutA, chloroplastic [Vitis vinifera]	0.993148	0.931596	0.673376	0.00369424	GO:0005507(MF:copper ion binding)	-
TRINITY_DN140330_c3_g2	14-3-3 protein [Macleaya cordata]	1.03174	0.788498	0.666864	0.0231206	GO:0019904(MF:protein domain specific binding)	ko04114(Oocyte meiosis);ko04151(PI3K-Akt signaling pathway);ko04390(Hippo signaling pathway);ko04011(MAPK signaling pathway - yeast);ko04110(Cell cycle);ko04391(Hippo signaling pathway - fly);ko04722(Neurotrophin signaling pathway);ko05203(Viral carcinogenesis)
TRINITY_DN136916_c0_g1	PREDICTED: 26S proteasome non-ATPase regulatory subunit 13 homolog A [Vitis vinifera]	0.967199	0.373639	0.663198	0.00532026	GO:0043248(BP:proteasome assembly);GO:0006511(BP:ubiquitin-dependent protein catabolic process);GO:0008541(CC:proteasome regulatory particle, lid subcomplex);GO:0005634(CC:nucleus);GO:0005829(CC:cytosol);GO:0005198(MF:structural molecule activity)	ko05169(Epstein-Barr virus infection);ko03050(Proteasome)
TRINITY_DN138578_c2_g4	hypothetical protein PHAVU_002G197600g [Phaseolus vulgaris];gi|561032388|gb|ESW30967.1| hypothetical protein PHAVU_002G197600g [Phaseolus vulgaris]	1.00818	0.852041	0.656488	0.00987085	GO:0043248(BP:proteasome assembly);GO:0043161(BP:proteasome-mediated ubiquitin-dependent protein catabolic process);GO:0008541(CC:proteasome regulatory particle, lid subcomplex);GO:0005634(CC:nucleus);GO:0005829(CC:cytosol)	ko05169(Epstein-Barr virus infection);ko03050(Proteasome)
TRINITY_DN140925_c0_g7	PREDICTED: cytochrome c oxidase subunit 6a, mitochondrial-like isoform X2 [Nelumbo nucifera]	0.991234	0.879666	0.651621	0.00352446	-	ko05016(Huntington disease);ko05012(Parkinson disease);ko04260(Cardiac muscle contraction);ko05010(Alzheimer disease);ko04714(Thermogenesis);ko04932(Non-alcoholic fatty liver disease (NAFLD));ko00190(Oxidative phosphorylation)
TRINITY_DN142474_c1_g3	coatomer subunit zeta-1 [Morus notabilis];gi|587898126|gb|EXB86577.1| hypothetical protein L484_010641 [Morus notabilis]	1.03747	0.806985	0.648903	0.0412006	GO:0015031(BP:protein transport)	-
TRINITY_DN140957_c2_g2	PREDICTED: calcineurin B-like protein 3 [Nelumbo nucifera]	0.95552	0.118105	0.636487	0.00079851	GO:0005509(MF:calcium ion binding)	ko04370(VEGF signaling pathway);ko04650(Natural killer cell mediated cytotoxicity);ko04022(cGMP-PKG signaling pathway);ko05152(Tuberculosis);ko05167(Kaposi sarcoma-associated herpesvirus infection);ko04659(Th17 cell differentiation);ko04660(T cell receptor signaling pathway);ko04380(Osteoclast differentiation);ko04924(Renin secretion);ko04720(Long-term potentiation);ko04922(Glucagon signaling pat…
TRINITY_DN141794_c0_g1	Annexin [Macleaya cordata]	1.08173	0.353086	0.634333	0.0316154	GO:0009987(BP:cellular process);GO:0098662(BP:inorganic cation transmembrane transport);GO:0042221(BP:response to chemical);GO:0030001(BP:metal ion transport);GO:0071944(CC:cell periphery);GO:0044446(CC:intracellular organelle part);GO:0009507(CC:chloroplast);GO:0005773(CC:vacuole);GO:0016020(CC:membrane);GO:0043168(MF:anion binding);GO:0046914(MF:transition metal ion binding)	-
TRINITY_DN139380_c0_g3	PREDICTED: succinate dehydrogenase subunit 7B, mitochondrial [Nelumbo nucifera];gi|719964901|ref|XP_010254810.1| PREDICTED: succinate dehydrogenase subunit 7B, mitochondrial [Nelumbo nucifera]	0.982907	0.731097	0.617484	0.00166913	-	-
TRINITY_DN97768_c0_g1	T-complex protein 1 subunit alpha-like [Quercus suber];gi|1336310503|gb|POE51773.1| t-complex protein 1 subunit alpha [Quercus suber]	0.993394	0.899838	0.613077	0.0166315	GO:0005488(MF:binding)	-
TRINITY_DN141865_c1_g8	PREDICTED: 60S ribosomal protein L35 [Nelumbo nucifera]	0.859247	0.106021	0.596139	0.00331709	GO:0006412(BP:translation);GO:0005840(CC:ribosome);GO:0003735(MF:structural constituent of ribosome)	ko03010(Ribosome)
TRINITY_DN124647_c0_g3	centromere/microtubule-binding protein cbf5-like [Quercus suber];gi|1336344552|gb|POE78552.1| centromere/microtubule-binding protein cbf5 [Quercus suber]	1.0445	0.483202	0.56879	0.00453443	GO:0009451(BP:RNA modification)	ko03008(Ribosome biogenesis in eukaryotes)
TRINITY_DN138063_c3_g3	hypothetical protein AQUCO_01400613v1, partial [Aquilegia coerulea]	0.911923	0.353856	0.549848	0.0396737	GO:0016491(MF:oxidoreductase activity);GO:0005488(MF:binding)	-
TRINITY_DN137791_c3_g8	predicted protein [Hordeum vulgare subsp. vulgare]	0.941016	0.434785	0.460041	0.00714421	GO:0019904(MF:protein domain specific binding)	-
TRINITY_DN135066_c0_g1	cytochrome b-c1 complex subunit 7-2 [Citrus clementina];gi|557553725|gb|ESR63739.1| hypothetical protein CICLE_v10009887mg [Citrus clementina]	0.896811	0.309071	0.399045	0.00196867	GO:0034551(BP:mitochondrial respiratory chain complex III assembly);GO:0009060(BP:aerobic respiration);GO:0006122(BP:mitochondrial electron transport, ubiquinol to cytochrome c);GO:0005750(CC:mitochondrial respiratory chain complex III);GO:0008121(MF:ubiquinol-cytochrome-c reductase activity)	ko05016(Huntington disease);ko05012(Parkinson disease);ko04260(Cardiac muscle contraction);ko04714(Thermogenesis);ko05010(Alzheimer disease);ko04932(Non-alcoholic fatty liver disease (NAFLD));ko00190(Oxidative phosphorylation)
